# Supplementary material for: EVI1 exerts distinct roles in AML via ERG and cyclin D1 promoting a chemoresistant and immune-suppressive environment
Source: PubMed Central journal article supplement — Blood Adv. 2022 Oct 27;7(8):1577–93. doi: 10.1182/bloodadvances.2022008018 (PMC10139867; doi:10.1182/bloodadvances.2022008018), 2022-10-27

## 1 SUPPLEMENTAL MATERIAL AND METHODS

### 2 Plasmid construction

3 The plasmids pMSCV-neo-*KMT2A-MLLT1*, pGCDNsam-*KMT2A-MLLT1-IRES-*  
4 *Kusabira-Orange*, pMYs-3×*FLAG-Evi1-IRES-GFP*, pMYs-*HoxA9-IRES-Meis1*, and  
5 pGCDNsam-*MOZ-TIF2-IRES-EGFP* have been described previously<sup>1-3</sup>. shRNA  
6 constructs on the pSIREN-RetroQ-puro and pSIREN-RetroQ-DsRed-Express  
7 backgrounds (Clontech Japan, Tokyo, Japan) were generated according to the  
8 manufacturer's instructions. For the plasmids used for reporter assays, we amplified  
9 genomic DNA from the tail of C57B6 mice with the primers shown in supplemental table  
10 2 with restriction enzyme cleavage sites and cloned them into the firefly luciferase  
11 reporter gene plasmid pGL4.10 or pGL4.23 (Promega, Madison, WI). According to the  
12 manufacturer's manual, KOD-Plus-Mutagenesis Kit (Toyobo, Japan) was used to delete  
13 consensus motifs from the reporter plasmids using the primers shown in supplemental  
14 table 2.

15

### 16 Retrovirus production, transduction, and cell selection

17 Briefly, Plat-E packaging cells were transiently transfected with 6-12 µg of each  
18 retrovirus vector mixed with 48-96 µl of polyethylenimines (PEI) and 500 µl of 150 mM

19 NaCl, followed by incubation at 37°C. The culture medium was replaced 12 hours after  
20 transfection. The retrovirus-containing supernatant was collected 24 hours after medium  
21 change, filtered through a 0.45 µm filter, and added to the culture plate coated with  
22 RetroNectin (Takara Bio, Japan). The culture plate was centrifuged at 2000 × g, 37°C for  
23 4 hours, and the supernatant was discarded. Cells were seeded onto the virus-coated plate  
24 and infected with retroviruses for 24 hours. For puromycin selection, puromycin was  
25 added at the concentration of 1 µg/mL at least from 24 to 72 hours after the start of  
26 infection, where > 99% of cells without retroviral transduction died. After 48 hours of  
27 selection, surviving cells were used for further experiments. Puromycin was continuously  
28 added to the culture medium after that.

29

### 30 **In vitro culture**

31 Murine AML cells and immortalized cells were maintained in RPMI 1640 supplemented  
32 with 10% FCS, 1% PS, 50 ng/mL murine recombinant stem cell factor, 20 ng/mL murine  
33 recombinant thrombopoietin, and 20 ng/mL murine recombinant interleukin 3.  
34 Palbociclib (Medchemexpress) and Fascaplysin chloride (Cayman) were added to the  
35 culture medium, and the medium was changed by half once per day.

36

37 **Colony-forming assay**

38 An indicated number of cells were seeded in duplicate and cultured in cytokine-  
39 supplemented methylcellulose media (MethoCult GF M3434, Stem Cell Technologies,  
40 Vancouver, Canada) as per the manufacturer's instructions, and colonies were counted on  
41 day 7. The average colony number was adopted as the measurement value.

42

43 **Transplantation assay**

44 Sublethally irradiated (4.5 - 6.5 Gy) mice were intravenously injected with an indicated  
45 number of AML cells, depending on the experiments. Recipient mice were clinically  
46 monitored at least once in three days, and a complete blood count was performed once in  
47 1-12 weeks, depending on the model of AML and as indicated. The frequency of AML  
48 cells in the peripheral blood was monitored by FACSCelesta (Becton, Dickinson and  
49 Company, Japan: BD, Tokyo, Japan) as indicated. The mice were euthanized when they  
50 showed clinical signs of illness, including anemia, malaise, and cachexia.

51

52 **Flow cytometry**

53 A mixture of antibodies for CD3 $\epsilon$  (AB\_312668 (BioLegend Cat . No. 100303)), CD4  
54 (RRID: AB\_312688 (BioLegend Cat. No. 100403)), CD8 (RRID: AB\_312742

55 (BioLegend Cat. No. 100703)), CD127 (RRID: AB\_466587 (eBioscience Cat. No. 13-  
56 1271-81)), B220 (RRID: AB\_312988 (BioLegend Cat. No. 103203)), Gr-1 (RRID:  
57 AB\_313368 (BioLegend Cat. No. 108403)), Mac-1 (RRID: AB\_466359 (eBioscience Cat.  
58 No. 13-0112-82)), and Ter-119 (RRID: AB\_313704 (BioLegend Cat. No. 116203)) was  
59 used to identify lineage<sup>+</sup> cells. Dead cells were excluded using DAPI (4',6-diamidino-2-  
60 phenylindole) (BD) or 7-AAD (7-amino-actinomycin D) (BD) according to the  
61 manufacturer's instructions. We defined L-GMPs as follows; GFP<sup>+</sup> (when applicable),  
62 lineage (Gr-1, B220, CD3, CD4, CD8, CD127, Ter119)-negative, c-kit<sup>+</sup>, Sca-1-,  
63 CD16/32<sup>+</sup> and CD34<sup>+</sup>. The data were analyzed with FlowJo software (Tree Star, Ashland,  
64 OR, USA, RRID:SCR\_008520)).

65

## 66 **Cell cycle analysis**

67 One million EVI1-AML cells undergoing 72-hour puromycin selection following  
68 transduction of shRNA cloned into pSIREN-RetroQ-puro were fixed in ice-cold 70%  
69 ethanol overnight. Cells were incubated with 1 µg/mL DAPI and 0.1% Triton X-100 for  
70 30 minutes at room temperature before analysis using FACSCelesta. Mean + SD from 3  
71 independent experiments were shown.

72

73 **Apoptosis assay**

74 One million EVI1-AML cells 48 hours after transduction of shRNA cloned into pSIREN-  
75 RetroQ-DsRed were stained with Annexin V-APC (BD, RRID:AB\_2868885) and DAPI  
76 (1 µg/ml) according to manufacturer's instructions. The frequency of annexin V<sup>+</sup> DAPI<sup>-</sup>  
77 cells and DAPI<sup>+</sup> cells were analyzed with FACSCelesta gating on DsRed<sup>+</sup> cells. Data  
78 were shown as mean + SD from 3 independent experiments.

79

80 **Magnetic cell separation of spleen T and NK cells**

81 To obtain spleen T cells, CD3<sup>+</sup> T cells were separated using CD3ε biotin-conjugated  
82 antibody, Streptavidin MicroBeads, and autoMACS (Miltenyi Biotec, Bergisch Gladbach,  
83 Germany) according to the manufacturer's protocol. Residual cells underwent further  
84 separation of CD49b<sup>+</sup> NK cells using the same protocol. Cells were used for RNA  
85 isolation after > 90% purity was confirmed using FACSCelesta.

86

87 **Real-time quantitative PCR (qPCR)**

88 Total RNA was prepared using Nucleospin-RNA II or RNA XS kit (Macherey-Nagel,  
89 Düren, Germany) and reverse-transcribed into cDNA with ReverTra Ace qPCR RT  
90 Master Mix (Toyobo, Osaka, Japan). Real-time qPCR was carried out on the

91 LightCycler480 (Roche) or QuantStudio system (Thermo Fisher) using SYBR green  
92 reagents in triplicate. Relative expression was normalized to the internal control. The list  
93 of primers used in qPCR is provided in Supplemental Table 2.

94

#### 95 **Western blot**

96 Primary antibodies used are as follows: anti-ERG (CST cat# 97249, RRID:AB\_2721841),  
97 anti-Cyclin D1 (CST cat#55506, RRID:AB\_2827374), anti-STAT1 (BD cat# 610185,  
98 RRID:AB\_397584), anti- $\beta$ -Actin (CST cat#4967, RRID:AB\_330288). Secondary  
99 antibodies used are anti-rabbit IgG, HRP-linked antibody (CST cat#7074,  
100 RRID:AB\_2099233) and anti-mouse IgG, HRP-linked antibody (CST cat#7076,  
101 RRID:AB\_330924). Western blotting was performed according to the protocol provided  
102 by CST.

103

#### 104 **Luciferase reporter assay**

105 For analysis of luciferase activities, COS-7 cells were seeded in 96-well culture plates at  
106 a density of  $1 \times 10^5$  per well. The cells were transfected with 100 ng of pGL4.23, pGL4.10,  
107 or an equimolar amount of each reporter construct, together with 100 ng of pME18S or  
108 an equimolar amount of pME18S-EVI1 expression plasmid and 2 ng of pRL-TK with

109 PEI. After 48 hours of culture, cells were harvested, and luciferase activities were  
110 measured in an ARVO MX (PerkinElmer, Waltham, MA) with a Dual-Glo luciferase  
111 assay system E2920 (Promega) to derive firefly and Renilla relative light unit values  
112 (RLU) from the same cell extract. To calculate the fold-change in reporter expression due  
113 to EVI1 expression, the firefly luciferase RLU was divided by the Renilla luciferase RLU  
114 value to give a normalized value, and then the normalized value was divided by the  
115 normalized value from the empty pGL4-Luc to give the fold-change. Data are expressed  
116 as mean + SD from 3 or more separate experiments.

117

### 118 **ChIP-sequencing analysis**

119 ChIP experiments were carried out using  $2 \times 10^6$  cells. The antibodies used in ChIP assays  
120 were Monoclonal Anti-FLAG M2 (F3165, Sigma-Aldrich, Cat# F3165,  
121 RRID:AB\_259529), anti-histone H3 (tri methyl K4) antibody (cat# ab8580,  
122 RRID:AB\_306649) and normal mouse IgG (Santa Cruz Biotechnology, Cat# sc-2025,  
123 RRID:AB\_737182). Bound DNA fragments were eluted and quantified by subsequent  
124 qPCR. The data were analyzed as previously described <sup>4</sup>. Briefly, reads were aligned to  
125 the mouse genome build mm10 using Bowtie2 version 2.4.1 <sup>5</sup> with default parameters.  
126 Quality assessment, read normalization, peak calling, and visualization were performed

127 by SSP version 1.2.2 <sup>6</sup> and DROMPAplus version 1.12.1 <sup>7</sup>. The default parameter set was  
128 used for peak calling (“100-bp bin, --pthre\_internal=5, --pthre\_enrich=4”).

129

### 130 **ChIP-qPCR analysis**

131 ChIP experiment using anti-FLAG antibody was performed as described above. ChIP  
132 against EVI1 (CST cat# 2593, RRID:AB\_2184098) in human HNT-34 AML cell line was  
133 performed employing first cross-linking for 45 minutes with DSG (disuccinimidyl  
134 glutarate, ThermoFisher cat#20593) before formaldehyde cross-linking. qPCR was  
135 carried out on the QuantStudio system (Thermo Fisher) using SYBR green reagents in  
136 triplicate. The relative amount was normalized to the input genome DNA. The list of  
137 primers used in ChIP-qPCR is provided in Supplemental Table 2.

138

### 139 **RNA-sequencing (RNA-seq) analysis**

140 The quality of the RNA samples (RNA Integrity Number > 9.5) was validated using an  
141 Agilent 2100 Bioanalyzer (Agilent Technology). Total RNA was submitted to the  
142 Genewiz sequencing facility (Jiangsu, China), then enrichment Poly-A RNAs for library  
143 preparation and strand-specific total RNA sequencing on the NovaSeq platform. FastQC  
144 (RRID:SCR\_014583) was used to perform RNA-seq data quality control with the default



145 parameters. Sequencing reads were mapped to GRCm39 by HISAT2 (v2.2.1,  
146 RRID:SCR\_015530) using default parameters. For pathway analysis, GSEA software  
147 (RRID:SCR\_005724) on the Java platform (v4.1.0) was used <sup>8,9</sup>.

148

### 149 **Single-cell RNA-sequencing (scRNA-seq) datasets**

150 By using the Seurat R package, cells with a unique feature count over 3000, less than 200,  
151 and  $\geq 10\%$  mitochondrial counts were filtered, followed by normalization using Seurat  
152 “NormalizeData” function with a scale factor of 10,000 and scaling using “ScaleData”  
153 function. The “Elbowplot” function was used to select dimensionality. Non-linear  
154 dimension reduction was performed by the “RunUMAP” function. Cells annotated as  
155 AML cells by the authors were used to draw a diagram <sup>10</sup>. Violin plot and two-color dot  
156 plot were drawn using “VlnPlot” and “FeaturePlot” functions.

157 Data from two patients were used as EVI1<sup>+</sup>-AML. AML328 is characterized by  
158 DNMT3A c.1910T>A p.L637Q, TP53 c.431A>C p.Q144P, c.455C>G p.P152R and  
159 FLT3-ITD with karyotype 45, XX, ider(3)(q10), inv(3)(q21q26.2), add(5)(q13), -7,  
160 add(9)?dup(q13q22). AML870 is characterized by ZRSR2 c.1147C>G p.P383A with  
161 karyotype 46, XY, t(9;11)(p21;q23).

162

163 **Data analysis using publicly available genetic data**

164 For selecting genes positively correlated to *EVII* using the transcriptome data <sup>11</sup>, the  
165 expressions of *EVII* (215851\_at and 221884\_at) were used as a phenotype on the GSEA  
166 software (v4.1.0) <sup>8,9</sup>, and genes with a score of more than 0.15 in both lists were selected.

167 For anti-ERG ChIP-seq, all available anti-ERG ChIP-Seq profiles of AML cells  
168 except acute promyelocytic leukemia were integrated from the ChIP-Atlas resource  
169 (<http://chip-atlas.org>, RRID:SCR\_015511) <sup>12</sup>. AML data (GSM2026052, GSM1122314,  
170 and GSM585590) were compared to that of normal CD34<sup>+</sup> progenitor cells (GSM585604)  
171 <sup>12-15</sup>. The binding of ERG to each gene locus given by Peak Browser on ChIP-Atlas was  
172 normalized to Z score. Genes for which the average Z-score in AML cells was at least 1  
173 greater than in normal CD34<sup>+</sup> cells were submitted to gene ontology (GO) analysis.

174 For GO analysis of positively correlated genes with *ERG*, genes that were  
175 positively correlated with ERG in OHSU datasets with a q-value less than 0.01 were  
176 submitted to GO analysis.

177

178

179 **SUPPLEMENTAL FIGURE LEGENDS**

180 **Supplemental figure 1. *Evi1*<sup>high</sup> cells show distinct features in murine AML models.**

181 **A.** UMAP plot of sc-RNA-seq data of AML cells from patient AML870 with  
182 t(9;11)(p21;q23), showing 4 clusters. **B.** Violin plot of MECOM expression in the 4  
183 clusters. **C.** Representative flow-cytometric data showing GFP (EVI1) positivity within  
184 the whole live leukemia cells and L-GMPs. **D.** Flow cytometric evaluation of KuO of  
185 GFP<sup>high</sup> and GFP<sup>low</sup> L-GMPs from KMT2A-MLLT1 AML harboring the *Evi1*-KI allele.  
186 **E.** Representative flow cytometric data of the bone marrow of secondary recipient mice  
187 transplanted with GFP<sup>high</sup> and GFP<sup>low</sup> L-GMPs as indicated. Both GFP<sup>high</sup> and GFP<sup>low</sup>  
188 fractions were generated from both GFP<sup>high</sup> and GFP<sup>low</sup> cells. **F-H.** A Kaplan-Meier  
189 survival curve for secondary recipient mice transplanted with an indicated number of  
190 GFP<sup>high</sup> or GFP<sup>low</sup> L-GMPs, after exposure to 6.5 Gy TBI. Significance between the same  
191 number of cells was examined by a log-rank test. **I-J.** GSEA showing that differentiation-  
192 related genes in HSCs (**I**) and doxorubicin-resistance-related genes (**J**) are up-regulated  
193 in GFP<sup>high</sup> L-GMPs. **K.** A model of the experiment to analyze the effect of exogenous  
194 expression of *Evi1* in KMT2A-MLLT1 AML cells. pMYs-IRES-GFP or pMYs-*Evi1*-  
195 IRES-GFP retroviral constructs were used to transduce freshly isolated KMT2A-MLLT1  
196 AML cells. After 48-hour culture, 20,000 GFP<sup>+</sup> cells were transplanted into primary

197 recipient mice. After AML development, 200 GFP<sup>+</sup> cells were subjected to colony-  
198 forming and transplantation assay into secondary recipient mice. L. A Kaplan-Meier  
199 survival curve for primary recipient mice.

200 FDR: false discovery rate (q-value), GSEA: gene set enrichment analysis, HSC:  
201 hematopoietic stem cells, KuO: Kusabira-Orange, L-GMP: leukemic granulocyte-  
202 macrophage progenitor, NES: normalized enrichment score, UMAP: Uniform Manifold  
203 Approximation and Projection.

204 Mean  $\pm$  S.D. \*  $p < 0.05$ .

205

206

207 **Supplemental figure 2. A combination of multimodal screening showed potential**  
208 **targets of EVI1 in AML cells.**

209 **A.** Expression of *Evi1* mRNA in EVI1-AML, compared to normal LSKs. **B.** ChIP-qPCR  
210 analysis using anti-FLAG antibody showing the binding of 3×FLAG-tagged EVI1 to the  
211 known EVI1-binding regions in the EVI1-AML samples. *Gata2* and *Pten* are positive  
212 controls, and *Alb* is a negative control. **C.** Distribution of binding sites of EVI1, elucidated  
213 by ChIP-seq using anti-FLAG antibody in the EVI1-AML samples. **D.** ChIP-qPCR  
214 analysis using anti-FLAG antibody showing the binding of 3×FLAG-tagged EVI1 to the  
215 EVI1-binding regions identified in the ChIP-seq of the EVI1-AML samples.  
216 Neighborhood sequences without enrichment in the ChIP-seq were used as a negative  
217 control.

218 *Alb*: Albumin, ChIP: chromatin immunoprecipitation, *Gata2*: GATA binding protein 2,  
219 *Pten*: Phosphatase and tensin homolog, qPCR: quantitative PCR.

220 Mean ± S.D. \*\* p < 0.01.

221

222

223 **Supplemental figure 3. ERG and CCND1 are targets of EVI1 in *Evi1*<sup>high</sup> AML cells.**

224 **A.** Detailed illustration of the results of ChIP-seq in the murine *Erg* locus, aligned with

225 the public ChIP-seq data of major hematopoietic transcription factors in an HPC-7 murine

226 hematopoietic progenitor cell line<sup>16</sup>. Blue bars represent the regions cloned into the

227 pGL4.23-luciferase reporter construct. **B-C.** Relative luciferase activity of *Erg* reporter

228 constructs in COS-7 cell lysates transiently transfected with EVI1 compared with that

229 without EVI1. Data were normalized to those of empty pGL4.23 plasmid and shown as

230 mean + SD from 4 independent experiments. **D.** Detailed illustration of the results of

231 ChIP-seq in the murine *Ccnd1* locus, aligned with the public ChIP-seq data of major

232 hematopoietic transcription factors in an HPC-7 murine hematopoietic progenitor cell

233 line<sup>16</sup>. Blue bars represent the regions cloned into the reporter construct. **E-F.** Relative

234 luciferase activity of *Ccnd1* reporter constructs in COS-7 cell lysates transiently

235 transfected with EVI1 compared with that without EVI1. Data were normalized to those

236 of empty pGL4.23 plasmid and shown as mean + SD from 4 independent experiments.

237 **G-H.** The regions corresponding to the murine *Erg* +85 and *Ccnd1* -4.0 - -3.6, which

238 EVI1 binds to in murine AML cells and show activating capacity in reporter assays

239 (indicated in the black bar). The amplicons used in anti-EVI1 ChIP-qPCR were shown as

240 ChIP qPCR 1 and 2. Dnase I hypersensitivity sites and transcription factor binding sites

241 in various cell lines, EVI1-binding consensus motifs (familial profile 241 and 95439380),  
242 the conserved area in the vertebrae, and Dnase I hypersensitivity sites in the human  
243 primary AML cells with inv(3) are shown <sup>17,18</sup>. **I-J.** GSEA shows that EWS-ETS and ERG  
244 fusion protein target genes in solid cancers are up-regulated in GFP<sup>high</sup> L-GMPs. **K.**  
245 Colony-forming activity of 500 c-kit<sup>+</sup> normal hematopoietic progenitor cells transduced  
246 with shRNAs against indicated genes.

247 FDR: false discovery rate (q-value), GSEA: gene set enrichment analysis, L-GMP:  
248 leukemic granulocyte-macrophage progenitor, NES: normalized enrichment score.

249 Mean ± S.D. \* p < 0.05, \*\* p < 0.01.

250

251 **Supplemental figure 4. *Evi1*<sup>high</sup> AML cells are dependent on ERG.**

252 **A.** Quantitative PCR showing the relative expression of *Erg* in EVI1-AML cells  
253 expressing sh*Erg* in vitro. **B.** Western blotting showing the efficacy of *Erg* silencing in  
254 EVI1-AML cells. **C.** Cell cycle analysis of EVI1-AML cells transduced with shRNAs  
255 against *Luciferase* and *Erg*. The sub-G1 peak represents hypodiploid apoptotic cells. **D.**  
256 Apoptosis analysis of EVI1-AML cells transduced by shRNAs against *Luciferase* and  
257 *Erg* with DsRed. Frequency of annexin V<sup>+</sup> DAPI<sup>-</sup> early apoptotic cells (Annexin V<sup>+</sup>) and  
258 DAPI<sup>+</sup> dead cells (DAPI<sup>+</sup>) in DsRed-labeled EVI1<sup>+</sup> AML cells were shown. **E.** A model  
259 of bone marrow transplantation experiments. **F.** A model of establishment of KMT2A-  
260 MLLT1-transduced immortalized cell clones. **G.** Expression of GFP-EVI1 in different  
261 KMT2A-MLLT1 clones. **H.** Expression of *Evi1* mRNA in different KMT2A-MLLT1  
262 clones, compared to normal LSKs. **I.** Relative cell proliferation of KMT2A-MLLT1 CL1  
263 cells expressing shRNAs against *Luciferase* and *Erg* in vitro. **J.** Colony-forming units of  
264 KMT2A-MLLT1 CL1 cells expressing shRNAs against *Luciferase* and *Erg*. **K.** A Kaplan-  
265 Meier survival curve for recipient mice transplanted with  $1 \times 10^6$  HOXA9-MEIS1 AML  
266 cells expressing shRNAs against *Luciferase* and *Erg* after being exposed to 6.5 Gy TBI.  
267 **L.** A 2D dot plot showing the relationship between differentially expressed genes after  
268 *Erg* deletion in normal HSCs and *Erg* knockdown in EVI1-AML cells. **M.** A volcano plot



269 showing differentially expressed genes in EVI1-AML cells with *Erg* silencing. **N.** GSEA  
270 showing that MYC-target genes are down-regulated in EVI1-AML cells with *Erg*  
271 silencing. **O.** Top listed GO biological processes of differentially binding regions in  
272 publicly available ChIP-seq data using an anti-ERG antibody between normal CD34<sup>+</sup>  
273 cells and AML cell lines (Kasumi-1 (GSM2026052), ME-1 (GSM1122314) and SKNO-  
274 1 (GSM585590)). **P.** Top listed GO biological processes positively correlated with *ERG*  
275 with a q-value < 0.01 in the OHSU datasets.

276 ChIP: chromatin immunoprecipitation, CL: clone, FDR: false discovery rate (q-value), ,  
277 GO: gene ontology, GSEA: gene set enrichment analysis, NES: normalized enrichment  
278 score, OHSU: Oregon Health Sciences University.

279 Mean ± S.D. \* p < 0.05, \*\* p < 0.01, \*\*\* p < 0.001.

280

281 **Supplemental figure 5. Cyclin D1 is necessary for the efficient development of EVI1-**

282 **AML in vivo.**

283 **A.** Quantitative PCR showing the relative expression of *Ccnd1* in EVI1-AML cells

284 expressing sh*Ccnd1* in vitro. **B.** Western blotting showing the efficacy of *Ccnd1* silencing

285 in EVI1-AML cells. **C.** Cell cycle analysis of EVI1-AML cells transduced with shRNAs

286 against *Luciferase* and *Ccnd1*. **D.** Relative cell proliferation of KMT2A-MLLT1 CL1

287 cells expressing shRNAs against *Luciferase* and *Ccnd1* in vitro. The data for sh*Luciferase*

288 are common to those of supplemental figure 4I. **E.** Colony-forming units of KMT2A-

289 MLLT1 CL1 cells expressing shRNAs against *Luciferase* and *Ccnd1*. The data for

290 sh*Luciferase* are common to those of supplemental figure 4J. **F.** Relative cell proliferation

291 of AML cells with sh*Ccnd1* compared to those with sh*Luciferase*, through days 0 to 3. A

292 comparison was made within the same cell between sh*Luciferase* and sh*Ccnd1*. **G.**

293 Relative cell proliferation of different clones of KMT2A-MLLT1 transformed cells

294 (Supplemental figure 4F) with indicated concentrations of palbociclib compared to that

295 with vehicle (0  $\mu$ M), through days 0 to 3. Clones were characterized by different

296 expression levels of GFP (*Evi1*). A relative cell number was compared to EVI1<sup>low</sup> CL1

297 cells at the same concentration. **H-I.** Relative cell proliferation of murine AML cells with

298 indicated concentrations of palbociclib (H) and faspaplysin (I) compared to that with

299 vehicle (0  $\mu$ M), through days 0 to 3. A relative cell number was compared to EVI1-AML  
300 cells at the same concentration. **J.** Frequency of GFP<sup>+</sup> cells in the bone marrow of lethally  
301 irradiated (8.5 Gy) recipient mice infused with  $5 \times 10^6$  AML cells, 16 hours after  
302 transplantation.

303 CL: clone.

304 Mean  $\pm$  S.D. \*  $p < 0.05$ , \*\*  $p < 0.01$ , \*\*\*  $p < 0.001$ .

305

306 **Supplemental figure 6. Cyclin D1 is associated with IFN signatures and immune**  
307 **exhaustion in EVI1-AML.**

308 **A.** GSEA showing gene sets associated with positive regulation of cell cycle are not  
309 significantly affected by silencing of *Ccnd1* in vitro. **B.** GSEA showing gene sets  
310 associated with response to interferon- $\gamma$  are down-regulated by silencing of *Ccnd1* in vitro.  
311 **C.** GSEA showing gene sets associated with the response to type I interferon are down-  
312 regulated by silencing of *Ccnd1* in vitro. **D.** GSEA showing gene sets associated with the  
313 chemokine signaling are down-regulated by silencing of *Ccnd1* in vivo. **E.** Detailed  
314 illustration of the results of ChIP-seq in the murine *Stat1* promoter region. A blue bar  
315 represents the regions cloned into the pGL4.10-luciferase reporter construct. **F.** Relative  
316 luciferase activity of *Stat1* promoter constructs in COS-7 cell lysates transiently  
317 transfected with EVI1 compared with that without EVI1. Data were normalized to those  
318 of empty pGL4.10 plasmid and shown as mean + SD from 3 independent experiments.  
319 **G.** Quantitative PCR showing the relative expression of *Stat1* in EVI1-AML cells  
320 expressing shRNA against *Evi1*. The efficiency of *Evi1* silencing was shown in the Figure  
321 3D. **H.** A model of the experiment to analyze the expression of exhaustion-associated  
322 genes in spleen T cells in the early stage of AML development. EVI1-AML cells  
323 expressing shRNA from secondary recipient mice were transplanted into tertial recipient

324 mice without in vitro culture. **I.** A model of the experiment to analyze the composition of  
325 T cells infiltrating the liver in the AML mice. **J-K.** Pearson correlation analysis between  
326 IFN- $\gamma$  score and *MECOM*/*CCND1* expression in OHSU samples. **L.** Pearson correlation  
327 analysis between *STAT1* and *MECOM* expression in TCGA samples. **M.** Pearson  
328 correlation analysis between *CD274* and *MECOM* expression in TCGA samples. **N.**  
329 Pearson correlation analysis between *CD274* and *CCND1* expression in OHSU samples.  
330 FDR: false discovery rate (q-value), GSEA: Gene Set Enrichment Analysis, NES:  
331 normalized enrichment score, OHSU: Oregon Health Sciences University, TBI: total  
332 body irradiation, TCGA: The Cancer Genome Atlas.

333 Mean  $\pm$  S.D. \*  $p < 0.05$ , \*\*  $p < 0.01$ .

334

335

336 **Supplemental figure 7. Overexpression of *CCND1* is associated with type II IFN**  
337 **signature in human AML.**

338 **A.** Western blotting showing the efficacy of *Stat1* silencing in EVI1-AML cells. **B.**

339 Relative cell proliferation of EVI1-AML cells expressing shRNAs against *Luciferase* and

340 *Stat1* in vitro. **C.** Quantitative PCR showing the relative expression of *Ifngr1* in EVI1-

341 AML cells expressing sh*Ifngr* in vitro. **D.** Quantitative PCR showing the relative

342 expression of *Ifnar1* in EVI1-AML cells expressing sh*Ifnar* in vitro. **E.** A Kaplan-Meier

343 survival curve for recipient mice transplanted with  $1 \times 10^6$  EVI1-AML cells expressing

344 shRNAs against *Ifnar*, after exposure to 4.5 Gy TBI. **F.** Quantitative PCR showing the

345 relative expression of chemokines and *Stat1* in EVI1-AML cells after treatment of

346 Palbociclib (0.3  $\mu$ M) for 72 hours. **G.** Pearson correlation analysis between *CCL2* and

347 *CCND1* expression in OHSU samples. **H.** Pearson correlation analysis between *CCL4*

348 and *MECOM* expression in TCGA samples. **I.** Pearson correlation analysis between

349 *CCL4* and *CCND1* expression in OHSU samples. **J.** Pearson correlation analysis between

350 estimated expression of *TIGIT* in CD4 T cells calculated using CIBERSORTx and

351 *MECOM* expression in TCGA samples. **K.** Pearson correlation analysis between

352 estimated expression of *TIGIT* in CD8 T cells calculated using CIBERSORTx and

353 *CCND1* expression in OHSU samples. **L.** Pearson correlation analysis between estimated

354 expression of *IFNG* in CD8 T cells calculated using CIBERSORTx and *CCND1*  
355 expression in OHSU samples. **M.** Pearson correlation analysis between estimated  
356 expression of *ICOS* in CD8 T cells calculated using CIBERSORTx and *MECOM*  
357 expression in TCGA samples. **N.** Pearson correlation analysis between estimated  
358 expression of *LAG3* in NK cells calculated using CIBERSORTx and *MECOM* expression  
359 in TCGA samples.

360 OHSU: Oregon Health Sciences University, TBI: total body irradiation, TCGA: The  
361 Cancer Genome Atlas.

362 Mean  $\pm$  S.D.

363

364

365

**Supplemental table 1. Details of antibodies used for flow cytometry**

| Epitope       | Conjugate       | Clone     | Concentration | Company     |
|---------------|-----------------|-----------|---------------|-------------|
| B220          | Biotin          | RA3-6B2   | 1:200         | BioLegend   |
| CD3e          | Biotin          | 145-2C11  | 1:200         | BioLegend   |
|               | PerCP-Cy5.5     | 145-2C11  | 1:200         | BD          |
| CD4           | Biotin          | GK1.5     | 1:200         | BioLegend   |
|               | PE              | GK1.5     | 1:200         | BioLegend   |
| CD8           | Biotin          | 53-6.7    | 1:200         | BioLegend   |
|               | PerCP           | 53-6.7    | 1:200         | BioLegend   |
| CD11b         | Biotin          | M1/70     | 1:200         | eBioscience |
| CD16/32       | APC             | 93        | 1:200         | eBioscience |
|               | PE              | 93        | 1:200         | BioLegend   |
| CD34          | FITC            | RAM34     | 1:50          | eBioscience |
|               | Alexa Flour 647 | RAM34     | 1:50          | BD          |
| CD122         | APC             | 5H4       | 1:200         | BioLegend   |
| CD127         | Biotin          | A7R34     | 1:200         | eBioscience |
|               | PE              | A7R34     | 1:200         | eBioscience |
| CD279         | APC-Cy7         | 29F.1A12  | 1:200         | BioLegend   |
| c-kit         | APC             | 2B8       | 1:200         | BioLegend   |
|               | PE-Cy7          | 2B8       | 1:200         | BD          |
| Gr-1          | Biotin          | RB6-8C5   | 1:200         | BioLegend   |
| Sca-1         | PE-Cy7          | E13-161.7 | 1:200         | BioLegend   |
|               | PerCP-Cy5.5     | D7        | 1:200         | BioLegend   |
| Streptoavidin | APC-Cy7         |           | 1:200         | BioLegend   |
|               | PerCP-Cy5.5     |           | 1:200         | BD          |
| Ter-119       | Biotin          | Ter-119   | 1:200         | BioLegend   |
| TIGIT         | PE-Cy7          | 1G9       | 1:200         | BioLegend   |

366

367



368 **Supplemental table 2. Primers, oligos, and cloning templates used in this study.**

| Primer         | Application | Sequences                |
|----------------|-------------|--------------------------|
| shLuciferase F | Construct   | TCGAAGTATTCCGCGTACG      |
| shLuciferase R | Construct   | CGTACGCGGAATACTTCGA      |
| shErg-1 F      | Construct   | AAGTATTACTACAGAAATAGA    |
| shErg-1 R      | Construct   | TCTATTTCTGTAGTAATACTT    |
| shErg-2 F      | Construct   | GGGAAACTACCTGTGTTTAAAAA  |
| shErg-2 R      | Construct   | TTTTTAAACACAGGTAGTTTCCC  |
| shCnd1-1 F     | Construct   | TTGATTCTTTTATATGTTTTT    |
| shCnd1-1 R     | Construct   | AAAAACATATAAAAAGAATCAA   |
| shCnd1-2 F     | Construct   | ATGAAATAGTGACATAATATATT  |
| shCnd1-2 R     | Construct   | AATATATTATGTCACTATTTTCAT |
| shEVII F       | Construct   | ATCTAAGGCTGAACTAGCAGA    |
| shEVII R       | Construct   | TCTGCTAGTTCAGCCTTAGAT    |
| shEvi1-1 F     | Construct   | ATCTAAGGCTGAACTAGCAGA    |
| shEvi1-1 R     | Construct   | TCTGCTAGTTCAGCCTTAGAT    |
| shEvi1-2 F     | Construct   | TCAGTGTCCCAAGGCATTAA     |
| shEvi1-2 R     | Construct   | TAAATGCCTTGGGACACTGA     |
| shEvi1-3 F     | Construct   | ACAGCAGTGTGAAGCCCTTTA    |
| shEvi1-3 R     | Construct   | TAAAGGGCTTCACACTGCTGT    |
| shStat1-3 R    | Construct   | TTAAAGTTATCTCACCAGGC     |
| shIfna-2 F     | Construct   | TTTCACAGACACATGTAAATA    |
| shIfna-2 R     | Construct   | TATTTACATGTGTCTGTGAAA    |
| shIfng-1 F     | Construct   | ACCGACGAATGTTCTAATTA     |
| shIfng-1 R     | Construct   | TTAATTAGAACATTCGTCGGT    |
| shIfng-2 F     | Construct   | GATGACAGAAAGGATTCAATT    |
| shIfng-2 R     | Construct   | AATTGAATCCTTTCTGTCATC    |
| shDnm3 F       | Construct   | CTGTGATATAAGCATTCTAAA    |
| shDnm3 R       | Construct   | TTAGAATGCTTATATCACAG     |
| shSelp F       | Construct   | TCCGAAAGATCAACAATAAGT    |
| shSelp R       | Construct   | ACTTATTGTTGATCTTTTCGGA   |
| shEtv1 F       | Construct   | TTGTTTATGAACTGTTAAAGA    |
| shEtv1 R       | Construct   | TCTTTAACAGTTCATAAACAA    |
| shEgln3 F      | Construct   | TTCTTATTCGCACTTTATGTA    |
| shEgln3 R      | Construct   | TACATAAAGTGCGAATAAGAA    |

|                            |           |                                           |
|----------------------------|-----------|-------------------------------------------|
| <i>shPhactr1</i> F         | Construct | TTGACAATTTGACATTAATTA                     |
| <i>shPhactr1</i> R         | Construct | TAATTAATGTCAAATTGTCAA                     |
| <i>shAngpt1</i> F          | Construct | AGCTAACAAATGGCTAGTTTT                     |
| <i>shAngpt1</i> R          | Construct | AAAAGTAGCCATTTGTAGCT                      |
| <i>shMkl2</i> F            | Construct | AGGAAAATAAATATTTTTACT                     |
| <i>shMkl2</i> R            | Construct | AGTAAAAATATTTATTTTCCT                     |
| <i>shHlcs</i> F            | Construct | AAGATACATATATAAAATTTA                     |
| <i>shHlcs</i> R            | Construct | TAAATTTTATATATGTATCTT                     |
| <i>shPtk7</i> F            | Construct | GAGCTTTTGACACTTATATGA                     |
| <i>shPtk7</i> R            | Construct | TCATATAAGTGTCAAAGCTC                      |
| <i>shEgfl7</i> F           | Construct | CTCCATCTTTGTCATAATAAA                     |
| <i>shEgfl7</i> R           | Construct | TTTATTATGACAAAGATGGAG                     |
| <i>shNbeal2</i> F          | Construct | GCCAAGTATGTCAAAGTTTGA                     |
| <i>shNbeal2</i> R          | Construct | TCAAAGTTTGACATAGTTGGC                     |
| <i>shOgt</i> F             | Construct | ATGAAGAAATTGGTTAGTATT                     |
| <i>shOgt</i> R             | Construct | AATACTAACCAATTTCTTCAT                     |
| <i>Erg+60</i> F            | Construct | CACAAGTGTGGCCAAGGGCCTCTG                  |
| <i>Erg+60</i> R            | Construct | CTGTCAGCTTCCCGGTTTCCCATTCATC              |
| <i>Erg+75</i> F            | Construct | GGCAGAGAGATGATGTCTCAGAAGAGTTGGC           |
| <i>Erg+75</i> R            | Construct | CTGGGCACGGAGAACAACCCGTG                   |
| <i>Erg+85</i> F            | Construct | GGTAGGTACCCCGTATCCATTTGTAGCC              |
| <i>Erg+85</i> R            | Construct | GGGCTGCCGTCAACTAAGGTTCTCTG                |
| <i>Erg+85</i> ΔFP241 F     | Construct | AATTCAAATCTGGTTGTTTAGTCTACATGGAG<br>CAGGG |
| <i>Erg+85</i> ΔFP241 R     | Construct | ACGGCCCCTTCACAGATGTGCACAGATG              |
| <i>Erg+85</i> Δ95439380 F  | Construct | ATCTCATTTCGACAAGACTTCCCTTTCCTC            |
| <i>Erg+85</i> Δ95439380 R  | Construct | AACGAGTGTTCAGCCCTGATAACCCATCTG            |
| <i>Ccnd1</i> -0.6 - 0 F    | Construct | GACAGGGACGCTGGGATTTCTAAGC                 |
| <i>Ccnd1</i> -0.6 - 0 R    | Construct | CTTCGCAGCACAGGAGCTGGTGTTC                 |
| <i>Ccnd1</i> -1.4 - -0.3 F | Construct | CTGGGACACGAAAGTATTCGGTGGGAA               |
| <i>Ccnd1</i> -1.4 - -0.3 R | Construct | TCGTAGATATGCAAATCGCTCGGACTGC              |
| <i>Ccnd1</i> -2.4 - -0.3 F | Construct | GGGTTCGAGGAGGCAGGAAATCCG                  |
| <i>Ccnd1</i> -2.4 - -0.3 R | Construct | TCGTAGATATGCAAATCGCTCGGACTGC              |
| <i>Ccnd1</i> -4.0 - -0.3 F | Construct | TAGTTCCTCTCTGGCTTCTACCACAGTCAG            |
| <i>Ccnd1</i> -4.0 - -0.3 R | Construct | TCGTAGATATGCAAATCGCTCGGACTGC              |

|                                   |           |                                |
|-----------------------------------|-----------|--------------------------------|
| <i>Ccnd1</i> -4.0 - -3.6 F        | Construct | TAGTTCCTCTCTGGCTTCTACCACAGTCAG |
| <i>Ccnd1</i> -4.0 - -3.6 R        | Construct | GGCGGACCCATGGCACTAGCCTC        |
| <i>Ccnd1</i> -3.8 - -3.6 F        | Construct | GTTACCCGCGGGGAGCGTCCTCA        |
| <i>Ccnd1</i> -4.0 - -3.6 R        | Construct | GGCGGACCCATGGCACTAGCCTC        |
| <i>Ccnd1</i> -4.0 - -3.6 ΔFP241 F | Construct | TAGTTCCTCTCTGGCTTCTACCACAGTCAG |
| <i>Ccnd1</i> -4.0 - -3.6 ΔFP241 R | Construct | GTGGCTTGGACGCGCGGGCGGA         |
| <i>Ccnd1</i> -3.8 - -3.6 ΔFP241 F | Construct | GTTACCCGCGGGGAGCGTCCTCA        |
| <i>Ccnd1</i> -3.8 - -3.6 ΔFP241 R | Construct | GTGGCTTGGACGCGCGGGCGGA         |
| <i>Stat1 promoter</i> F           | Construct | AGTGATGCGCCTACTTAATGCAGGATCTCC |
| <i>Stat1 promoter</i> R           | Construct | GACTCGGCGCTGAAAACCGAAAGTACC    |
| <i>Gapdh</i> F                    | qPCR      | TGGCCTCCAAGGAGTAAGAA           |
| <i>Gapdh</i> R                    | qPCR      | GGTCTGGGATGGAATTGTG            |
| 18s RNA F                         | qPCR      | CGCGGTTCTATTTTGTGGT            |
| 18s RNA R                         | qPCR      | AGTCGGCATCGTTTATGGTC           |
| <i>Erg</i> F                      | qPCR      | AAGGCCATGATCCAGACTGT           |
| <i>Erg</i> R                      | qPCR      | ACTGGTCCTCGCTCACAAC            |
| <i>Ccnd1</i> F                    | qPCR      | GAGATTGTGCCATCCATGC            |
| <i>Ccnd1</i> R                    | qPCR      | CTCCTCTTCGCACTTCTGCT           |
| <i>Evi1</i> F                     | qPCR      | GGAGGAGGACTTGCAACAAA           |
| <i>Evi1</i> R                     | qPCR      | GACAGCATGTGCTTCTCCAA           |
| <i>Stat1</i> F                    | qPCR      | GGAGGTGAACCTGACTTCCA           |
| <i>Stat1</i> R                    | qPCR      | CAAAGGCGTGGTCTTTGTCA           |
| <i>Ifngr</i> F                    | qPCR      | GAGCTTTGACGAGCACTGAG           |
| <i>Ifngr</i> R                    | qPCR      | CCAGGAACCCGAATACACCT           |
| <i>Ifnar</i> F                    | qPCR      | ATCTCCAAGTGGATGCCAA            |
| <i>Ifnar</i> R                    | qPCR      | TGAATAGCCAGGAAGCCACT           |
| <i>Lag3</i> F                     | qPCR      | CTCCATCACGTACAACCTCAAGG        |
| <i>Lag3</i> R                     | qPCR      | GGAGTCCACTTGGCAATGAGCA         |
| <i>Pcd1</i> F                     | qPCR      | CCCTAGTGGGTATCCCTGTATT         |
| <i>Pcd1R</i>                      | qPCR      | TCCTTCAGAGTGTCGTCCTT           |
| <i>Tigit</i> F                    | qPCR      | GCTGACCCACAGGAATACTTTA         |
| <i>Tigit</i> R                    | qPCR      | GAGAGACATAGGGAGAGGGATAG        |
| <i>Ccl2</i> F                     | qPCR      | GAAGGAATGGGTCCAGACATAC         |
| <i>Ccl2</i> R                     | qPCR      | TCACACTGGTCACTCCTACA           |
| <i>Ccl4</i> F                     | qPCR      | CCACTTCCTGCTGTTTCTCTTAC        |

|                                   |           |                          |
|-----------------------------------|-----------|--------------------------|
| <i>Ccl4</i> R                     | qPCR      | GGAGACACGCGTCCTATAACTA   |
| <i>Ccl5</i> F                     | qPCR      | GCCCACGTCAAGGAGTATTT     |
| <i>Ccl5</i> R                     | qPCR      | CTGATTTCTTGGGTTTGCTGTG   |
| ChIP PC <i>Pten</i> promoter 3 F  | ChIP-qPCR | TTTAATTTCCGAGTTTGCGTTAAT |
| ChIP PC <i>Pten</i> promoter 3 R  | ChIP-qPCR | AGTAAACTGCCTTGAAGCAAGTGA |
| ChIP PC <i>Gata2</i> promoter 2 F | ChIP-qPCR | CAGGCTCTGGCTGCACCT       |
| ChIP PC <i>Gata2</i> promoter 2 R | ChIP-qPCR | TTCCATACCCTACGCTCTCC     |
| ChIP NC <i>Alb</i> promoter F     | ChIP-qPCR | CTCCAGATGGCAAACATACG     |
| ChIP NC <i>Alb</i> promoter R     | ChIP-qPCR | TCTGTGTGCAGAAAGACTCG     |
| ChIP <i>Erg</i> +85 1 F           | ChIP-qPCR | AGAGTGACCCACCCTCCTTT     |
| ChIP <i>Erg</i> +85 1 R           | ChIP-qPCR | AACGGTTGGACAGAACTTGC     |
| ChIP <i>Erg</i> +85 2 F           | ChIP-qPCR | CAGGGAGCTGCTTAAACTGG     |
| ChIP <i>Erg</i> +85 2 R           | ChIP-qPCR | ACTCTTTCCCCGAACTTGGT     |
| ChIP NC <i>Erg</i> F              | ChIP-qPCR | CTTGAGCTCCACCCTGAGAG     |
| ChIP NC <i>Erg</i> R              | ChIP-qPCR | TGAATCATGAGGCTCAGCAC     |
| ChIP <i>Ccnd1</i> 1 F             | ChIP-qPCR | CAGCGGAGCCAAGACAGTAT     |
| ChIP <i>Ccnd1</i> 1 R             | ChIP-qPCR | CGCTTACCGTAAACCTTGGA     |
| ChIP <i>Ccnd1</i> 2 F             | ChIP-qPCR | GTCGCGTCCAAGGTTTACG      |
| ChIP <i>Ccnd1</i> 2 R             | ChIP-qPCR | CTGCTCCCTGTGGTGCTT       |
| ChIP NC <i>Ccnd1</i> F            | ChIP-qPCR | ATGCATGCACAGACACAGGT     |
| ChIP NC <i>Ccnd1</i> R            | ChIP-qPCR | CTGGCCCATCTGCAATAGAT     |
| ChIP <i>ERG</i> 1 F               | ChIP-qPCR | GGTGCACATCTGCAGAAAGA     |
| ChIP <i>ERG</i> 1 R               | ChIP-qPCR | TTCAGCCCTGATAACCCATC     |
| ChIP <i>ERG</i> 2 F               | ChIP-qPCR | CTGTGCCAGATGGGTTATC      |
| ChIP <i>ERG</i> 2 R               | ChIP-qPCR | CCTCCTCTTAACGGCTGATG     |
| ChIP NC <i>ERG</i> F              | ChIP-qPCR | AGAACTCTGGGCATGCTTGT     |
| ChIP NC <i>ERG</i> R              | ChIP-qPCR | TGATGGTGTTCGTGAGCATT     |
| ChIP <i>CCND1</i> 1 F             | ChIP-qPCR | GACCCCTTAGGGAATTCTGG     |
| ChIP <i>CCND1</i> 1 R             | ChIP-qPCR | TCCTCCCCTCACCTCTCC       |
| ChIP <i>CCND1</i> 2 F             | ChIP-qPCR | GAGGGGAGGAGGCGAGAG       |
| ChIP <i>CCND1</i> 2 R             | ChIP-qPCR | TTTTCTAAGCCTTACGGTAAACG  |
| ChIP NC <i>CCND1</i> F            | ChIP-qPCR | GACAGCACGAATCACAATGG     |
| ChIP NC <i>CCND1</i> R            | ChIP-qPCR | GGTGGTGGGAAGAATCAGAA     |

369

370

371 **Supplemental Table 3. GSEA report for positively enriched pathways in GFPhigh**  
372 **L-GMPs (C2 chemical and genetic perturbations)**

|    | Pathway                                            | SIZE | NES  | NOM<br>p-val | FDR<br>q-val | FWER<br>p-val |
|----|----------------------------------------------------|------|------|--------------|--------------|---------------|
| 1  | KYNG_DNA_DAMAGE_BY_UV                              | 51   | 2.81 | 0            | 0.168        | 0             |
| 2  | BOSCO_INTERFERON_INDUCED_ANTIVIRAL_MODUL<br>E      | 62   | 2.57 | 0            | 0.168        | 0.168         |
| 3  | BOYLAN_MULTIPLE_MYELOMA_PCA3_DN                    | 61   | 2.53 | 0            | 0.168        | 0.168         |
| 4  | KIM_WT1_TARGETS_UP                                 | 199  | 2.52 | 0            | 0.168        | 0.168         |
| 5  | LUI_THYROID_CANCER_CLUSTER_1                       | 46   | 2.52 | 0            | 0.168        | 0.168         |
| 6  | ICHIBA_GRAFT_VERSUS_HOST_DISEASE_35D_UP            | 127  | 2.5  | 0            | 0.168        | 0.168         |
| 7  | GAL_LEUKEMIC_STEM_CELL_DN                          | 204  | 2.5  | 0            | 0.168        | 0.168         |
| 8  | RICKMAN_TUMOR_DIFFERENTIATED_WELL_VS_POO<br>RLY_DN | 334  | 2.45 | 0            | 0.168        | 0.168         |
| 9  | ICHIBA_GRAFT_VERSUS_HOST_DISEASE_D7_UP             | 99   | 2.44 | 0            | 0.168        | 0.168         |
| 10 | LEE_TARGETS_OF_PTCH1_AND_SUFU_UP                   | 48   | 2.44 | 0            | 0.168        | 0.168         |
| 11 | GROSS_HYPOXIA_VIA_HIF1A_DN                         | 99   | 2.43 | 0            | 0.168        | 0.168         |
| 12 | KYNG_DNA_DAMAGE_DN                                 | 162  | 2.41 | 0            | 0.168        | 0.168         |
| 13 | LANDIS_ERBB2_BREAST_TUMORS_324_UP                  | 141  | 2.4  | 0            | 0.168        | 0.168         |
| 14 | MARTIN_VIRAL_GPCR_SIGNALING_UP                     | 75   | 2.39 | 0            | 0.168        | 0.168         |
| 15 | PROVENZANI_METASTASIS_DN                           | 121  | 2.39 | 0            | 0.168        | 0.168         |
| 16 | AMUNDSON_DNA_DAMAGE_RESPONSE_TP53                  | 15   | 2.38 | 0            | 0.168        | 0.168         |
| 17 | LEE_AGING_NEOCORTEX_DN                             | 54   | 2.38 | 0            | 0.168        | 0.168         |
| 18 | WOTTON_RUNX_TARGETS_UP                             | 17   | 2.37 | 0            | 0.168        | 0.168         |
| 19 | DELYS_THYROID_CANCER_UP                            | 382  | 2.36 | 0            | 0.168        | 0.168         |
| 20 | MAGRANGEAS_MULTIPLE_MYELOMA_IGLL_VS_IGLK<br>_UP    | 38   | 2.35 | 0            | 0.168        | 0.168         |

373

374 **Supplemental table 4. GSEA report for positively enriched pathways in GFP<sup>high</sup> L-**  
 375 **GMPs (C5 Gene Ontology biological process)**

|    | Pathway                                                | SIZE | NES  | NOM<br>p-val | FDR<br>q-val | FWER<br>p-val |
|----|--------------------------------------------------------|------|------|--------------|--------------|---------------|
| 1  | GOBP_POSITIVE_REGULATION_OF_NIK_NF_KAPPAB_S<br>GNALING | 62   | 2.9  | 0            | 0.163        | 0             |
| 2  | GOBP_GANGLIOSIDE_METABOLIC_PROCESS                     | 22   | 2.84 | 0            | 0.163        | 0.163         |
| 3  | GOBP_HEMATOPOIETIC_STEM_CELL_DIFFERENTIATIO<br>N       | 26   | 2.84 | 0            | 0.163        | 0.163         |
| 4  | GOBP_CELLULAR_RESPONSE_TO_CORTICOSTEROID_S<br>TIMULUS  | 48   | 2.84 | 0            | 0.163        | 0.163         |
| 5  | GOBP_NEGATIVE_REGULATION_OF_PROTEIN_BINDIN<br>G        | 83   | 2.8  | 0            | 0.163        | 0.163         |
| 6  | GOBP_RESPONSE_TO_MOLECULE_OF_BACTERIAL_ORI<br>GIN      | 279  | 2.79 | 0            | 0.163        | 0.163         |
| 7  | GOBP_LYMPHOCYTE_MEDIATED_IMMUNITY                      | 233  | 2.76 | 0            | 0.163        | 0.163         |
| 8  | GOBP_POSITIVE_REGULATION_OF_BINDING                    | 152  | 2.74 | 0            | 0.163        | 0.163         |
| 9  | GOBP_CELLULAR_RESPONSE_TO_ALCOHOL                      | 73   | 2.74 | 0            | 0.163        | 0.163         |
| 10 | GOBP_CORONARY_VASCULATURE_DEVELOPMENT                  | 40   | 2.73 | 0            | 0.163        | 0.163         |
| 11 | GOBP_POSITIVE_REGULATION_OF_B_CELL_ACTIVATI<br>ON      | 78   | 2.73 | 0            | 0.163        | 0.163         |
| 12 | GOBP_ANTIGEN_PROCESSING_AND_PRESENTATION               | 74   | 2.72 | 0            | 0.163        | 0.163         |
| 13 | GOBP_LIOPROTEIN_LOCALIZATION                           | 16   | 2.69 | 0            | 0.163        | 0.163         |
| 14 | GOMF_CARBOXYPEPTIDASE_ACTIVITY                         | 38   | 2.69 | 0            | 0.163        | 0.163         |
| 15 | GOBP_POSITIVE_REGULATION_OF_DEFENSE_RESPONS<br>E       | 232  | 2.69 | 0            | 0.163        | 0.163         |
| 16 | GOBP_B_CELL_MEDIATED_IMMUNITY                          | 126  | 2.68 | 0            | 0.163        | 0.163         |
| 17 | GOBP_PEPTIDYL_CYSSTEINE_MODIFICATION                   | 45   | 2.68 | 0            | 0.163        | 0.163         |
| 18 | GOBP_MEMBRANE_INVAGINATION                             | 76   | 2.68 | 0            | 0.163        | 0.163         |
| 19 | GOBP_POSITIVE_REGULATION_OF_DNA_BINDING                | 47   | 2.65 | 0            | 0.163        | 0.163         |
| 20 | GOBP_GLYCOLIPID_BIOSYNTHETIC_PROCESS                   | 65   | 2.65 | 0            | 0.163        | 0.163         |

376

377

378 **Supplemental table 5. GSEA report for positively enriched pathways in shLuc-EVI1-**  
 379 **AML cells vs. shErg (C5 Gene Ontology biological process)**

|    | Pathway                                                   | SIZE | NES  | NOM<br>p-val | FDR<br>q-val | FWER p-<br>val |
|----|-----------------------------------------------------------|------|------|--------------|--------------|----------------|
| 1  | GOMF_STRUCTURAL_CONSTITUENT_OF_RIBOSOME                   | 126  | 2.02 | 0            | 0.026        | 0.029          |
| 2  | GOBP_NUCLEOBASE_CONTAINING_SMALL_MOLECULE_INTERCONVERSION | 26   | 1.96 | 0            | 0.044        | 0.097          |
| 3  | GOCC_RIBOSOMAL_SUBUNIT                                    | 152  | 1.94 | 0            | 0.042        | 0.135          |
| 4  | GOBP_METAPHASE_ANAPHASE_TRANSITION_OF_CELL_CYCLE          | 60   | 1.92 | 0            | 0.058        | 0.239          |
| 5  | GOBP_RIBOSOMAL_LARGE_SUBUNIT_BIOGENESIS                   | 59   | 1.92 | 0            | 0.049        | 0.252          |
| 6  | GOCC_SNO_S_RNA_CONTAINING_RIBONUCLEOPROTEIN_COMPLEX       | 26   | 1.91 | 0            | 0.046        | 0.28           |
| 7  | GOBP_RIBOSOME_BIOGENESIS                                  | 275  | 1.91 | 0            | 0.042        | 0.293          |
| 8  | GOCC_RIBOSOME                                             | 186  | 1.9  | 0            | 0.042        | 0.33           |
| 9  | GOBP_RIBONUCLEOPROTEIN_COMPLEX_BIOGENESIS                 | 399  | 1.9  | 0            | 0.039        | 0.335          |
| 10 | GOBP_DNA_DEPENDENT_DNA_REPLICATION                        | 148  | 1.9  | 0            | 0.035        | 0.341          |
| 11 | GOBP_NCRNA_PROCESSING                                     | 362  | 1.89 | 0            | 0.033        | 0.347          |
| 12 | GOBP_DNA_REPLICATION                                      | 263  | 1.89 | 0            | 0.032        | 0.366          |
| 13 | GOCC_LARGE_RIBOSOMAL_SUBUNIT                              | 93   | 1.89 | 0            | 0.03         | 0.368          |
| 14 | GOBP_RRNA_METABOLIC_PROCESS                               | 220  | 1.89 | 0            | 0.028        | 0.376          |
| 15 | GOCC_CONDENSED_CHROMOSOME_CENTROMERIC_REGION              | 111  | 1.88 | 0            | 0.033        | 0.432          |
| 16 | GOBP_MITOCHONDRIAL_GENE_EXPRESSION                        | 160  | 1.88 | 0            | 0.032        | 0.445          |
| 17 | GOBP_NCRNA_METABOLIC_PROCESS                              | 432  | 1.87 | 0            | 0.033        | 0.477          |
| 18 | HP_BICORNUATE_UTERUS                                      | 42   | 1.87 | 0            | 0.033        | 0.49           |
| 19 | GOBP_MITOCHONDRIAL_TRANSLATION                            | 132  | 1.87 | 0            | 0.031        | 0.492          |
| 20 | GOBP_MITOTIC_SISTER_CHROMATID_SEGREGATION                 | 152  | 1.86 | 0            | 0.031        | 0.513          |

380

381

382 **Supplemental table 6. GSEA report for positively enriched pathways in shLuc-EVI1-**  
 383 **AML cells vs. shCcmd1 in vitro (C5 Gene Ontology biological process)**

|    | Pathway                                                                               | SIZE | NES  | NOM<br>p-val | FDR<br>q-val | FWER<br>p-val |
|----|---------------------------------------------------------------------------------------|------|------|--------------|--------------|---------------|
| 1  | GOBP_RESPONSE_TO_TYPE_I_INTERFERON                                                    | 76   | 2.23 | 0            | 0.003        | 0.002         |
| 2  | GOBP_RESPONSE_TO_INTERFERON_GAMMA                                                     | 149  | 2.19 | 0            | 0.003        | 0.004         |
| 3  | GOBP_POSITIVE_REGULATION_OF_MACROPHAGE_MI<br>GRATION                                  | 23   | 2.12 | 0            | 0.007        | 0.015         |
| 4  | GOBP_RESPONSE_TO_INTERFERON_BETA                                                      | 27   | 2.09 | 0            | 0.01         | 0.03          |
| 5  | GOBP_TYPE_I_INTERFERON_PRODUCTION                                                     | 118  | 2.05 | 0            | 0.017        | 0.061         |
| 6  | GOBP_POSITIVE_REGULATION_OF_TUMOR_NECROSI<br>S_FACTOR_SUPERFAMILY_CYTOKINE_PRODUCTION | 74   | 2.05 | 0            | 0.016        | 0.07          |
| 7  | GOBP_MEMBRANE_RAFT_ORGANIZATION                                                       | 22   | 2.04 | 0            | 0.017        | 0.087         |
| 8  | GOBP_DEFENSE_RESPONSE_TO_VIRUS                                                        | 203  | 2.03 | 0            | 0.016        | 0.092         |
| 9  | GOBP_LYTIC_VACUOLE_ORGANIZATION                                                       | 67   | 2.02 | 0            | 0.017        | 0.109         |
| 10 | GOBP_POSITIVE_REGULATION_OF_TYPE_I_INTERFER<br>ON_PRODUCTION                          | 70   | 2.01 | 0            | 0.018        | 0.125         |
| 11 | GOBP_POSITIVE_REGULATION_OF_INTERFERON_BET<br>A_PRODUCTION                            | 30   | 2.01 | 0            | 0.018        | 0.133         |
| 12 | GOBP_LATE_ENDOSOME_TO_VACUOLE_TRANSPORT                                               | 22   | 2.01 | 0.003        | 0.017        | 0.138         |
| 13 | GOBP_MICROGLIAL_CELL_ACTIVATION                                                       | 44   | 2    | 0            | 0.016        | 0.146         |
| 14 | GOBP_INTERLEUKIN_6_PRODUCTION                                                         | 125  | 2    | 0            | 0.016        | 0.157         |
| 15 | GOBP_RELAXATION_OF_CARDIAC_MUSCLE                                                     | 16   | 1.99 | 0.003        | 0.017        | 0.176         |
| 16 | GOBP_INTERFERON_BETA_PRODUCTION                                                       | 46   | 1.98 | 0            | 0.019        | 0.208         |
| 17 | GOBP_POSITIVE_REGULATION_OF_INTERLEUKIN_6_P<br>RODUCTION                              | 70   | 1.98 | 0            | 0.018        | 0.21          |
| 18 | GOBP_RESPONSE_TO_INTERFERON_ALPHA                                                     | 19   | 1.97 | 0.002        | 0.019        | 0.232         |
| 19 | GOBP_RESPONSE_TO_VIRUS                                                                | 287  | 1.95 | 0            | 0.026        | 0.311         |
| 20 | GOBP_POSITIVE_REGULATION_OF_NEUROINFLAMMA<br>TORY_RESPONSE                            | 15   | 1.95 | 0            | 0.025        | 0.313         |

384

385



386 **References**

- 387 1. Yoshimi A, Goyama S, Watanabe-Okochi N, et al. Evi1 represses PTEN  
388 expression and activates PI3K/AKT/mTOR via interactions with polycomb proteins.  
389 *Blood*. 2011;117(13):3617-3628.
- 390 2. Arai S, Yoshimi A, Shimabe M, et al. Evi-1 is a transcriptional target of mixed-  
391 lineage leukemia oncoproteins in hematopoietic stem cells. *Blood*. 2011;117(23):6304-  
392 6314.
- 393 3. Kagoya Y, Yoshimi A, Kataoka K, et al. Positive feedback between NF- $\kappa$ B and  
394 TNF- $\alpha$  promotes leukemia-initiating cell capacity. *The Journal of clinical investigation*.  
395 2014;124(2):528-542.
- 396 4. Mizuno H, Koya J, Masamoto Y, Kagoya Y, Kurokawa M. Evi1 upregulates  
397 Fbp1 and supports progression of acute myeloid leukemia through pentose phosphate  
398 pathway activation. *Cancer Sci*. 2021;112(10):4112-4126.
- 399 5. Langmead B, Salzberg SL. Fast gapped-read alignment with Bowtie 2. *Nat*  
400 *Methods*. 2012;9(4):357-359.
- 401 6. Nakato R, Shirahige K. Sensitive and robust assessment of ChIP-seq read  
402 distribution using a strand-shift profile. *Bioinformatics*. 2018;34(14):2356-2363.
- 403 7. Nakato R, Sakata T. Methods for ChIP-seq analysis: A practical workflow and  
404 advanced applications. *Methods*. 2021;187:44-53.
- 405 8. Mootha VK, Lindgren CM, Eriksson K-F, et al. PGC-1 $\alpha$ -responsive genes  
406 involved in oxidative phosphorylation are coordinately downregulated in human diabetes.  
407 *Nat Genet*. 2003;34(3):267-273.
- 408 9. Subramanian A, Tamayo P, Mootha VK, et al. Gene set enrichment analysis: A  
409 knowledge-based approach for interpreting genome-wide expression profiles.  
410 *Proceedings of the National Academy of Sciences*. 2005;102(43):15545-15550.
- 411 10. van Galen P, Hovestadt V, Wadsworth Ii MH, et al. Single-Cell RNA-Seq  
412 Reveals AML Hierarchies Relevant to Disease Progression and Immunity. *Cell*.  
413 2019;176(6):1265-1281.e1224.
- 414 11. Valk PJ, Verhaak RG, Beijen MA, et al. Prognostically useful gene-expression  
415 profiles in acute myeloid leukemia. *N Engl J Med*. 2004;350(16):1617-1628.
- 416 12. Oki S, Ohta T, Shioi G, et al. ChIP-Atlas: a data-mining suite powered by full  
417 integration of public ChIP-seq data. *EMBO Rep*. 2018;19(12).
- 418 13. Mandoli A, Singh AA, Jansen PW, et al. CBF $\beta$ -MYH11/RUNX1 together with  
419 a compendium of hematopoietic regulators, chromatin modifiers and basal transcription  
420 factors occupies self-renewal genes in inv(16) acute myeloid leukemia. *Leukemia*.

- 421 2014;28(4):770-778.
- 422 14. Martens JH, Mandoli A, Simmer F, et al. ERG and FLI1 binding sites demarcate  
423 targets for aberrant epigenetic regulation by AML1-ETO in acute myeloid leukemia.  
424 *Blood*. 2012;120(19):4038-4048.
- 425 15. Mandoli A, Singh AA, Prange KHM, et al. The Hematopoietic Transcription  
426 Factors RUNX1 and ERG Prevent AML1-ETO Oncogene Overexpression and Onset of  
427 the Apoptosis Program in t(8;21) AMLs. *Cell Rep*. 2016;17(8):2087-2100.
- 428 16. Schütte J, Wang H, Antoniou S, et al. An experimentally validated network of  
429 nine haematopoietic transcription factors reveals mechanisms of cell state stability. *Elife*.  
430 2016;5:e11469.
- 431 17. Assi SA, Imperato MR, Coleman DJL, et al. Subtype-specific regulatory  
432 network rewiring in acute myeloid leukemia. *Nat Genet*. 2019;51(1):151-162.
- 433 18. Vierstra J, Lazar J, Sandstrom R, et al. Global reference mapping of human  
434 transcription factor footprints. *Nature*. 2020;583(7818):729-736.
- 435

# Supplemental figure 1

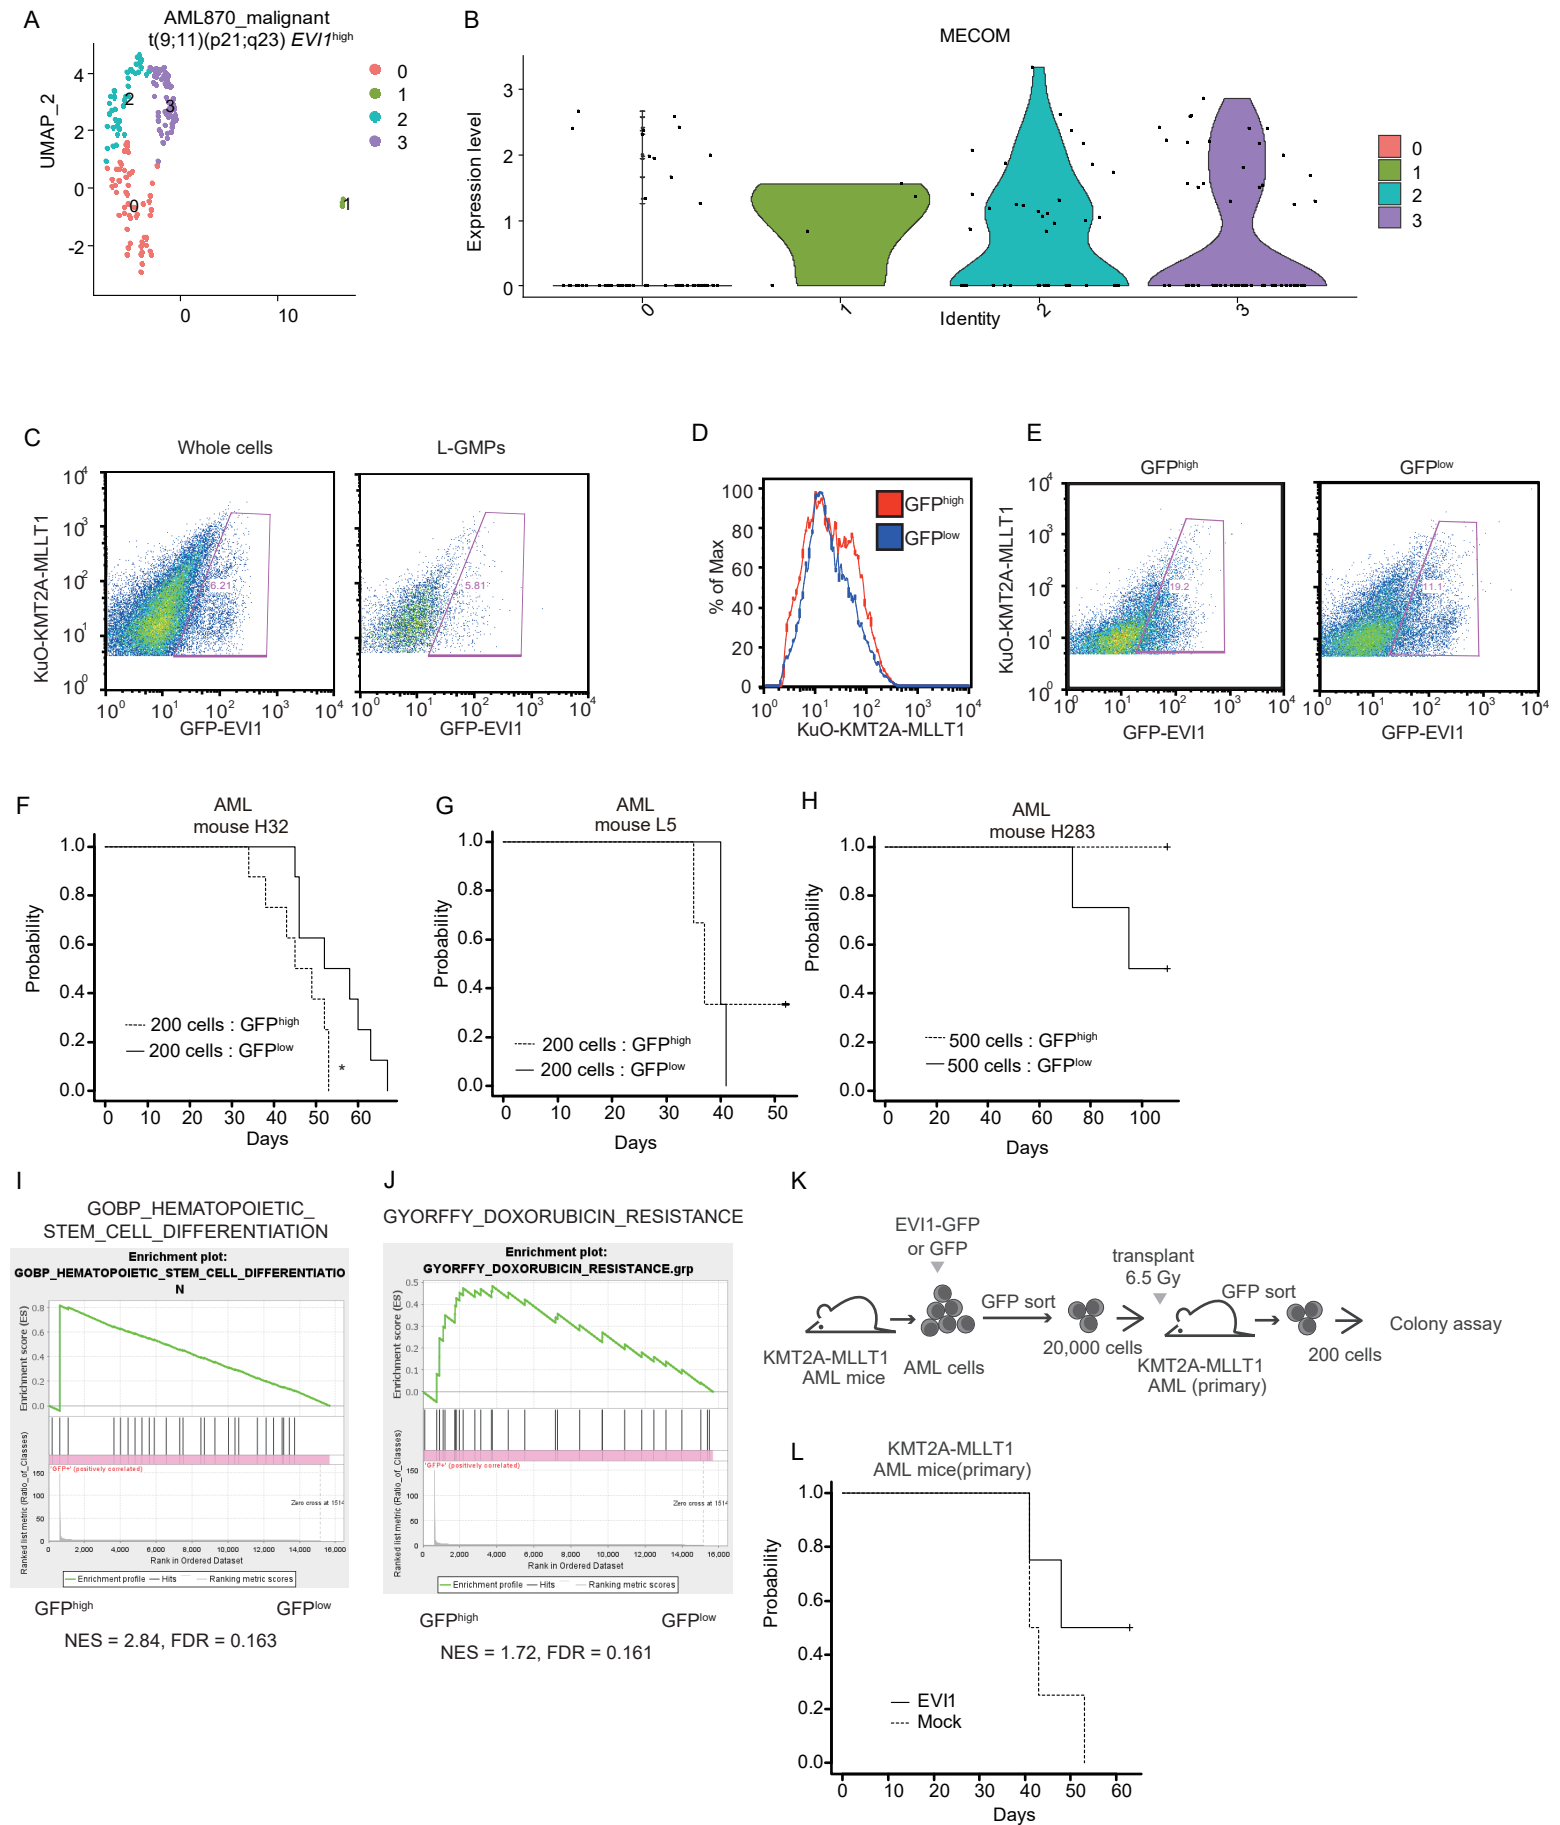

# Supplemental figure 2

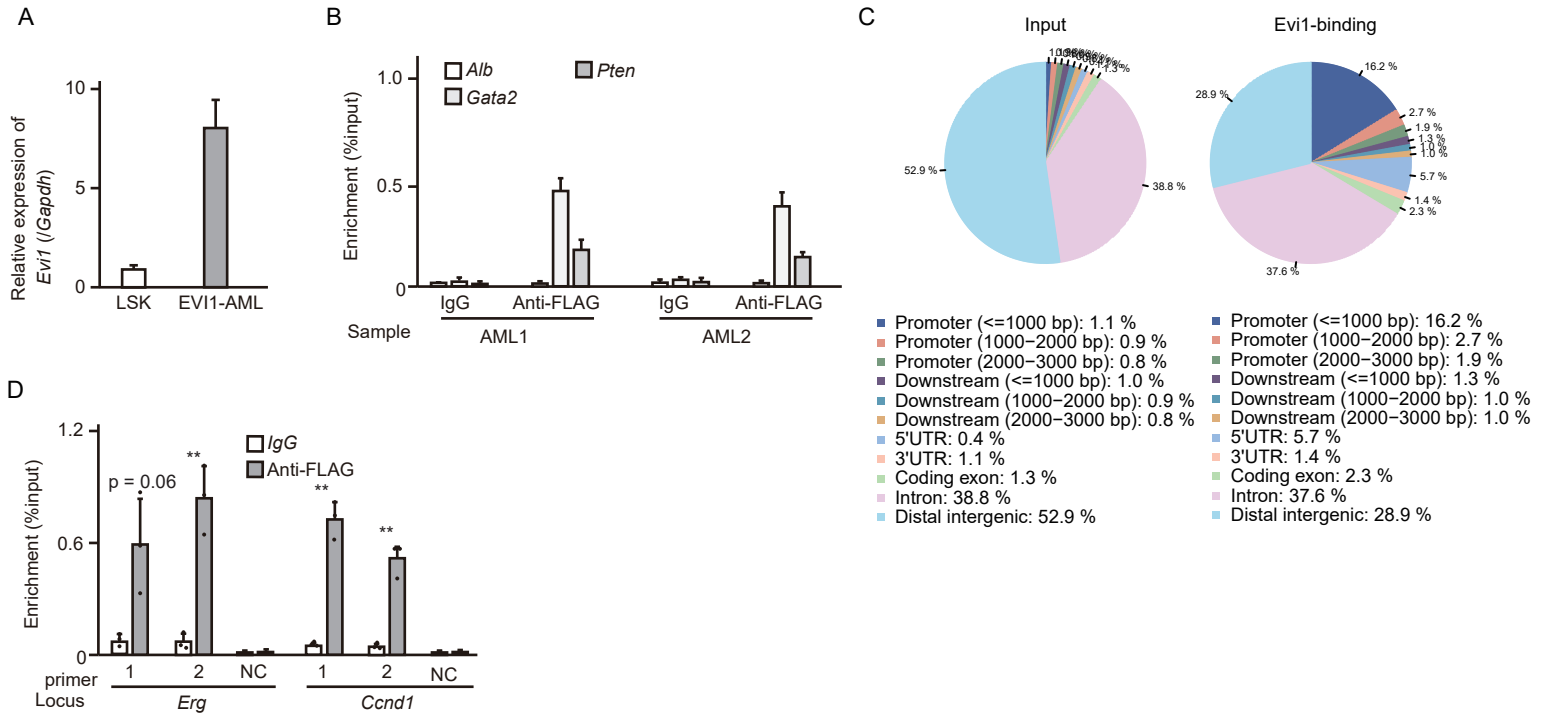

# Supplemental figure 3

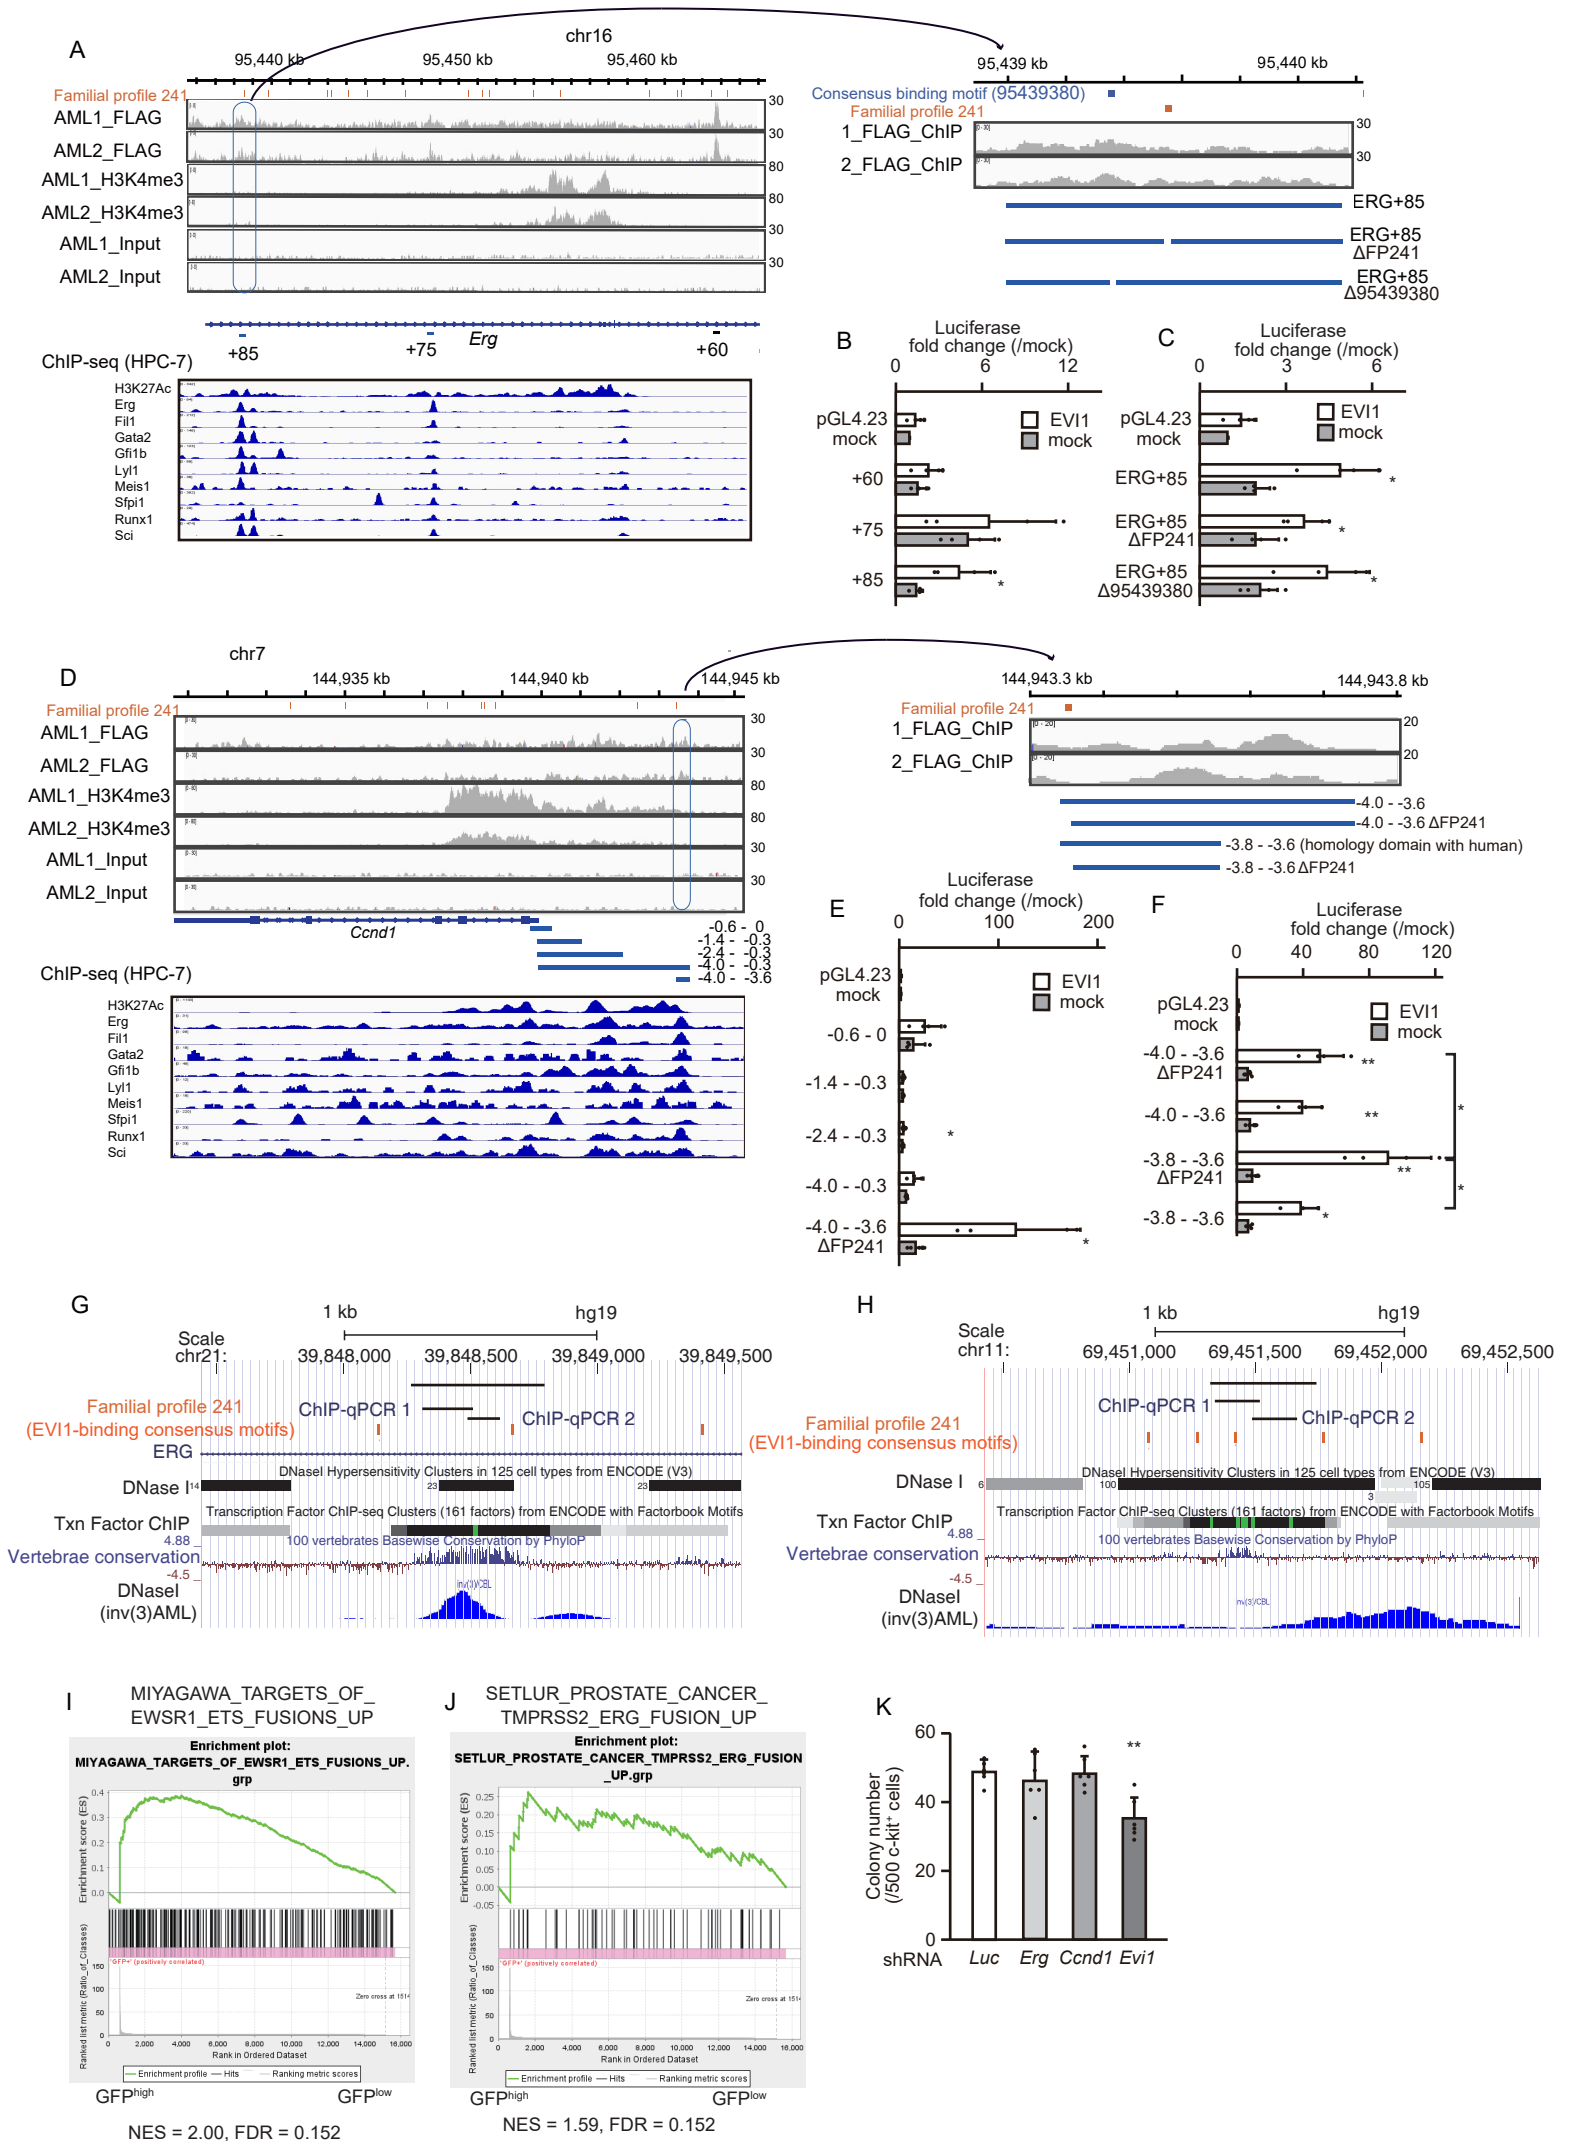

# Supplemental figure 4

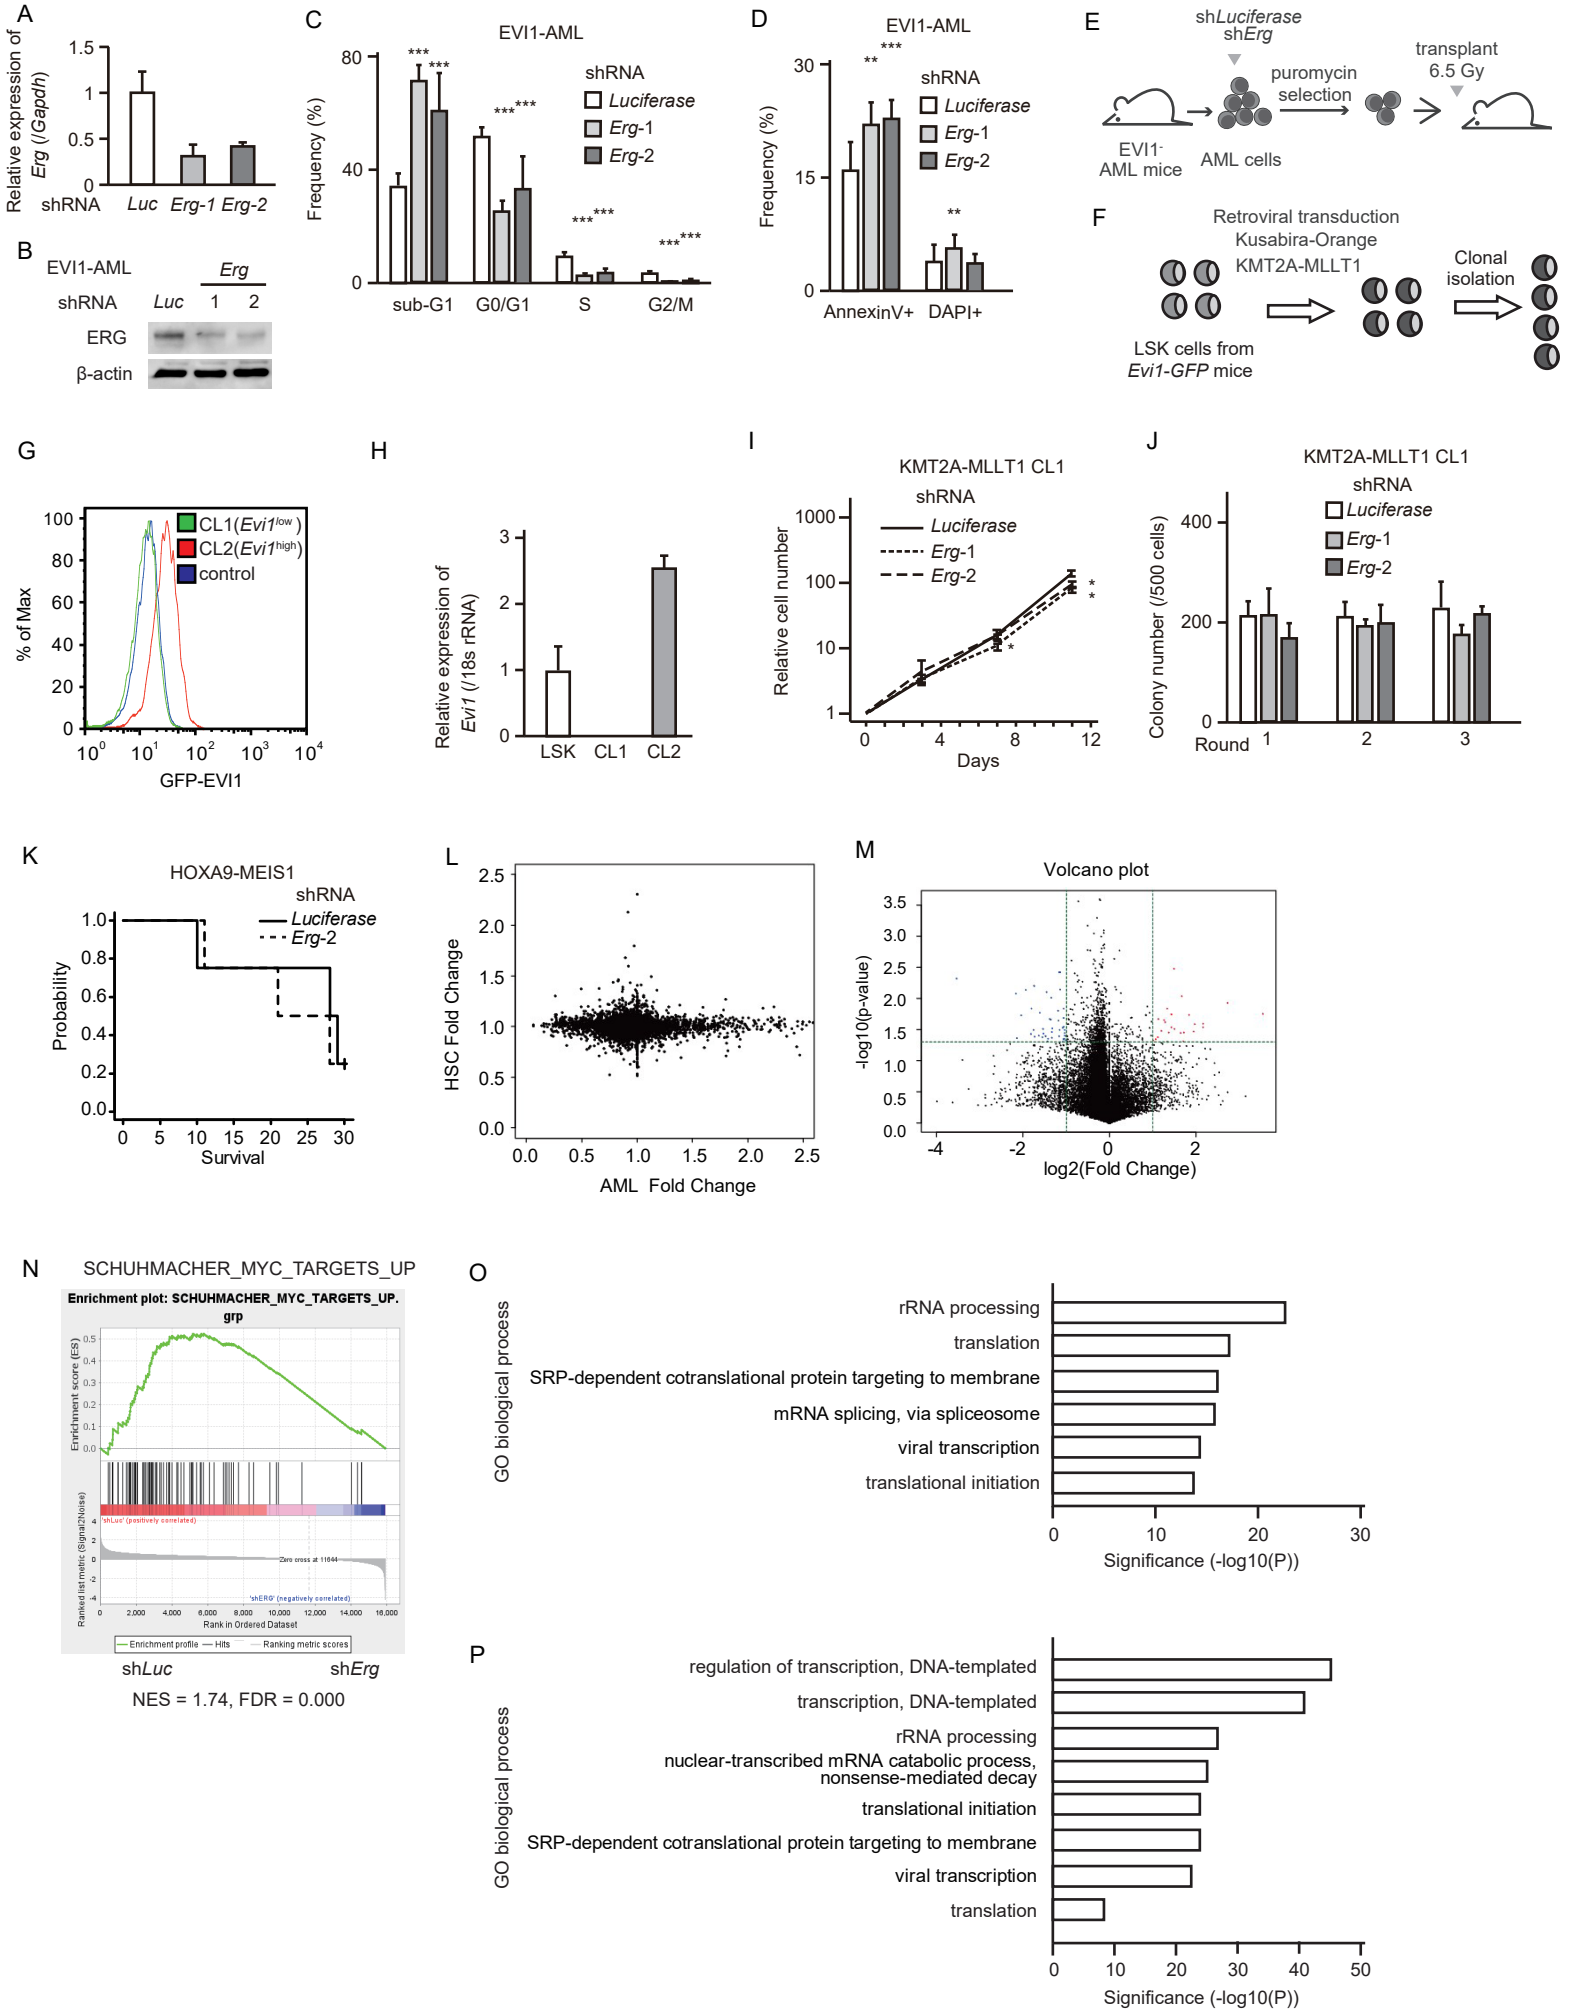

# Supplemental figure 5

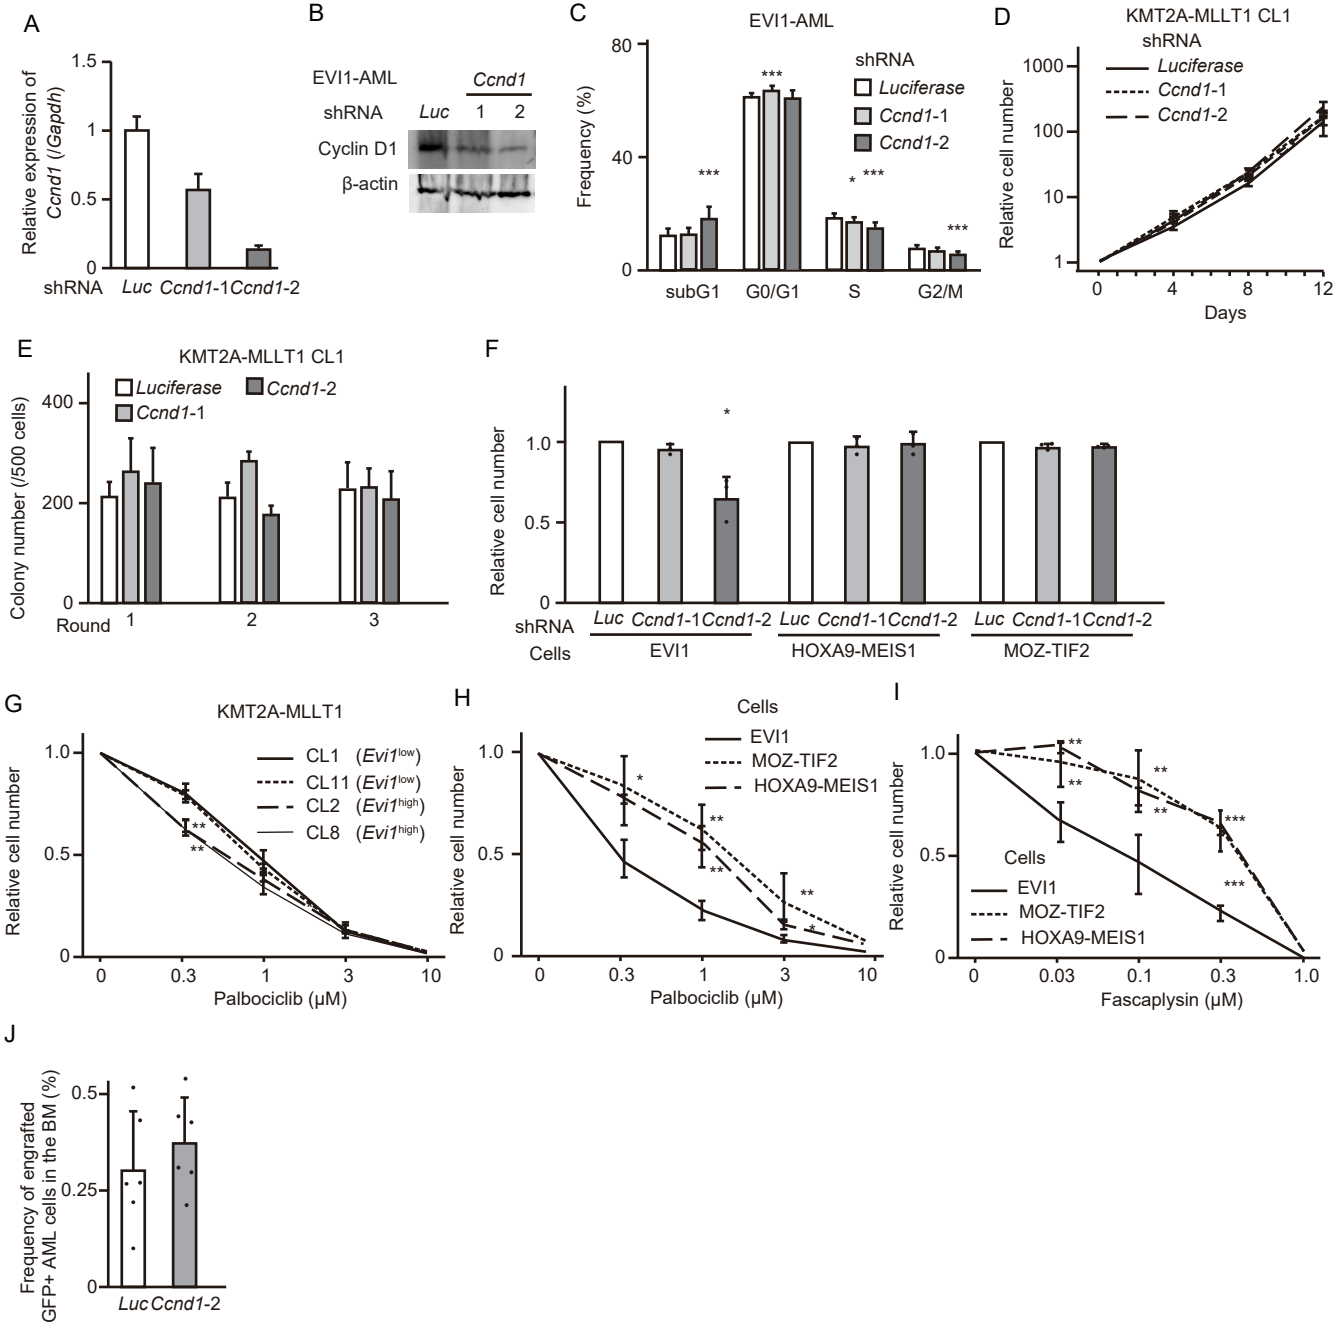

Supplemental figure 6

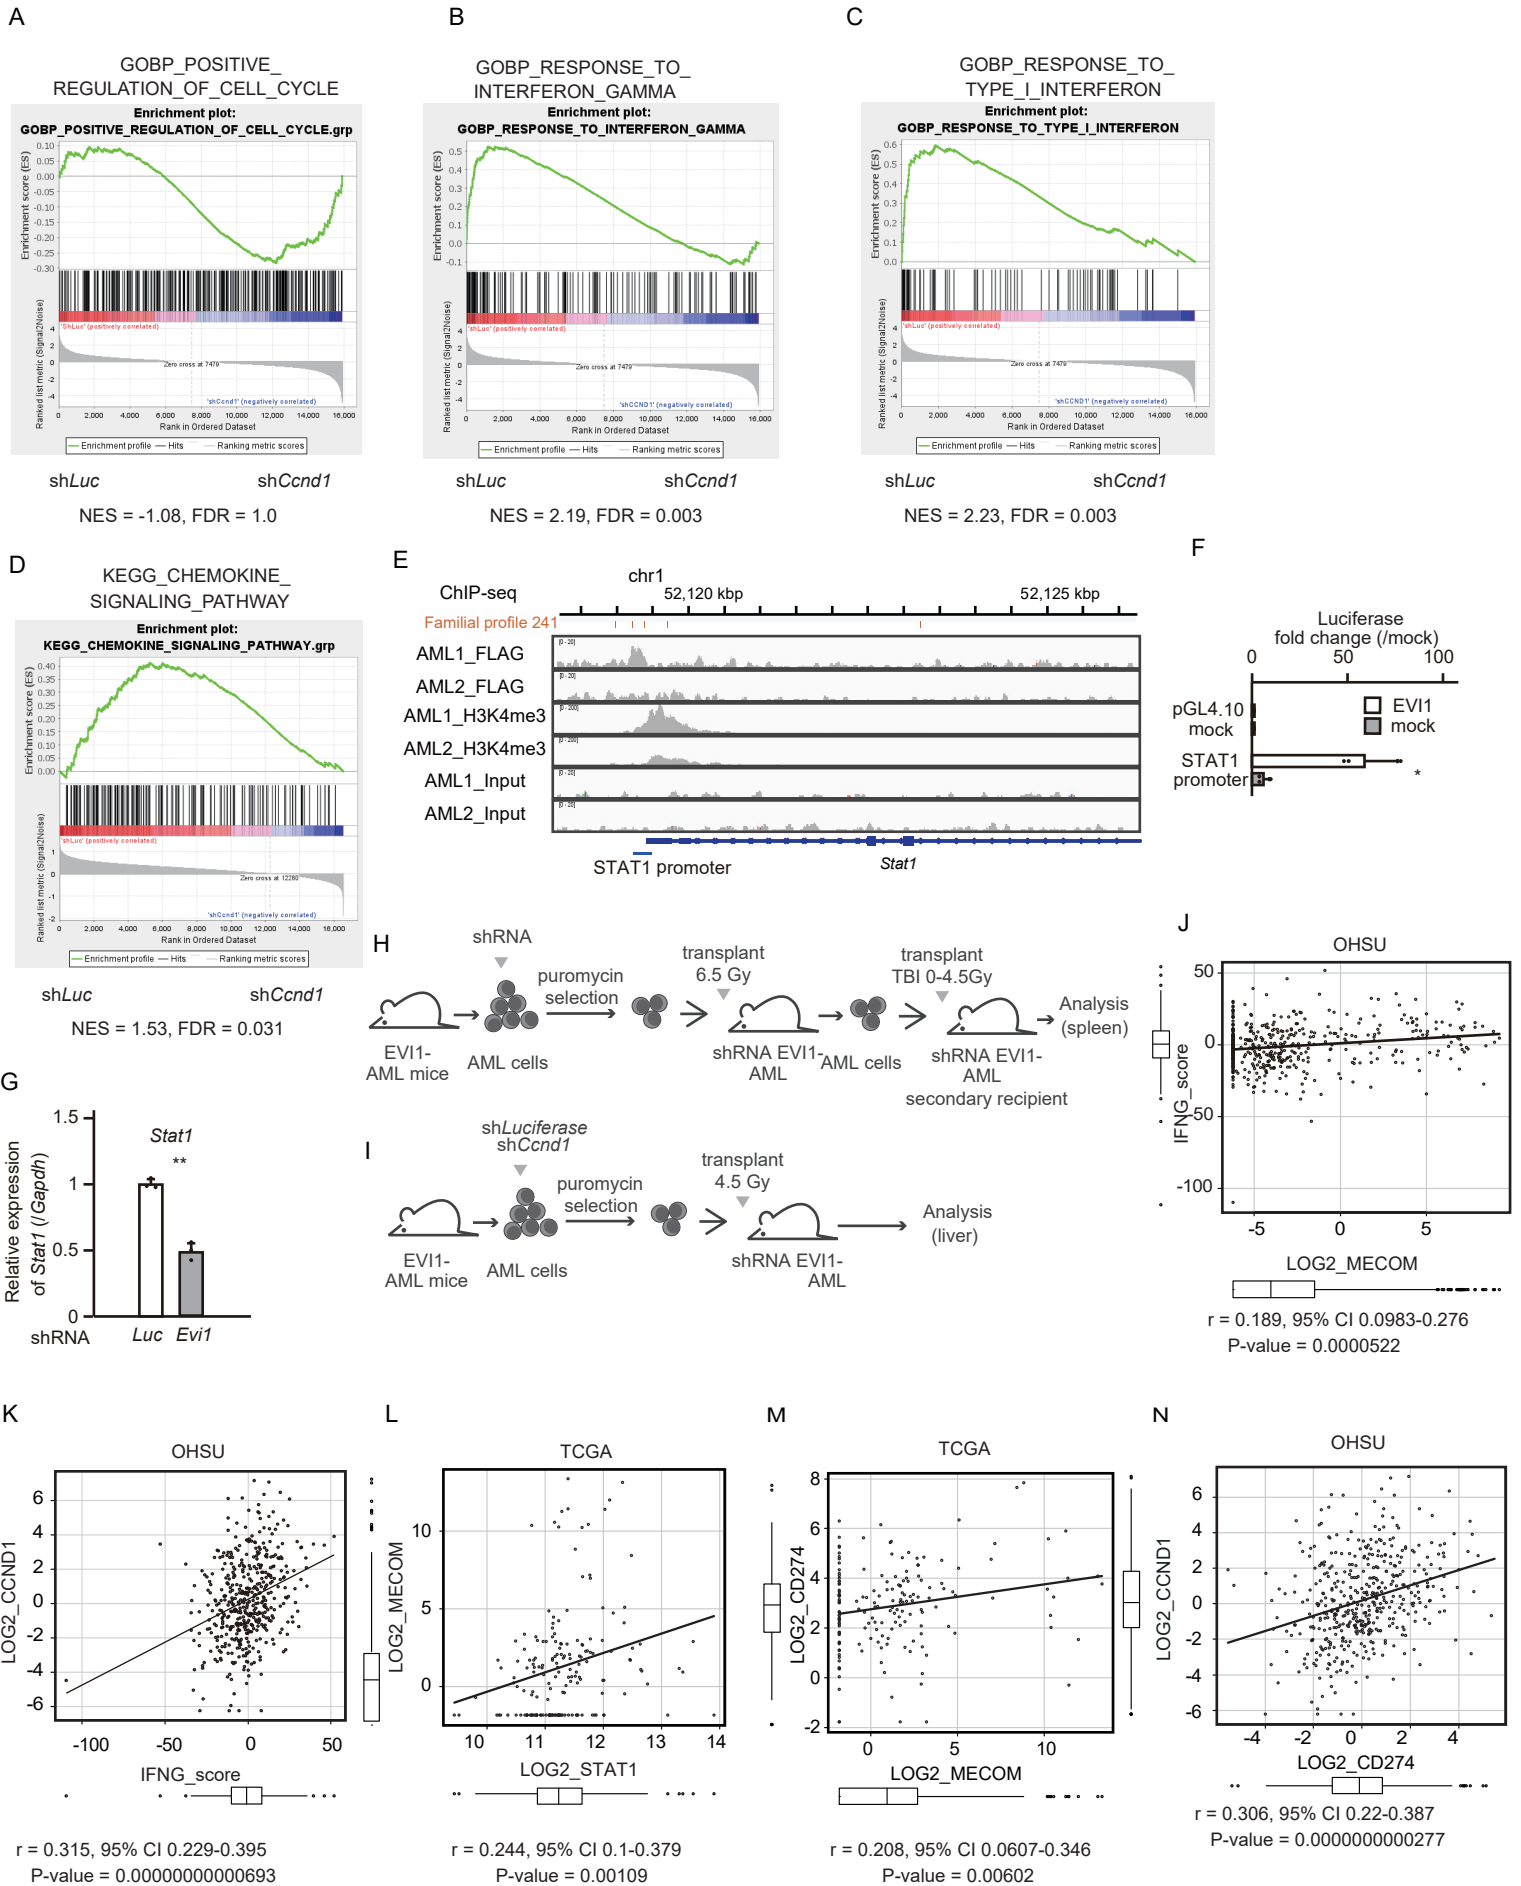



# Supplemental figure 7

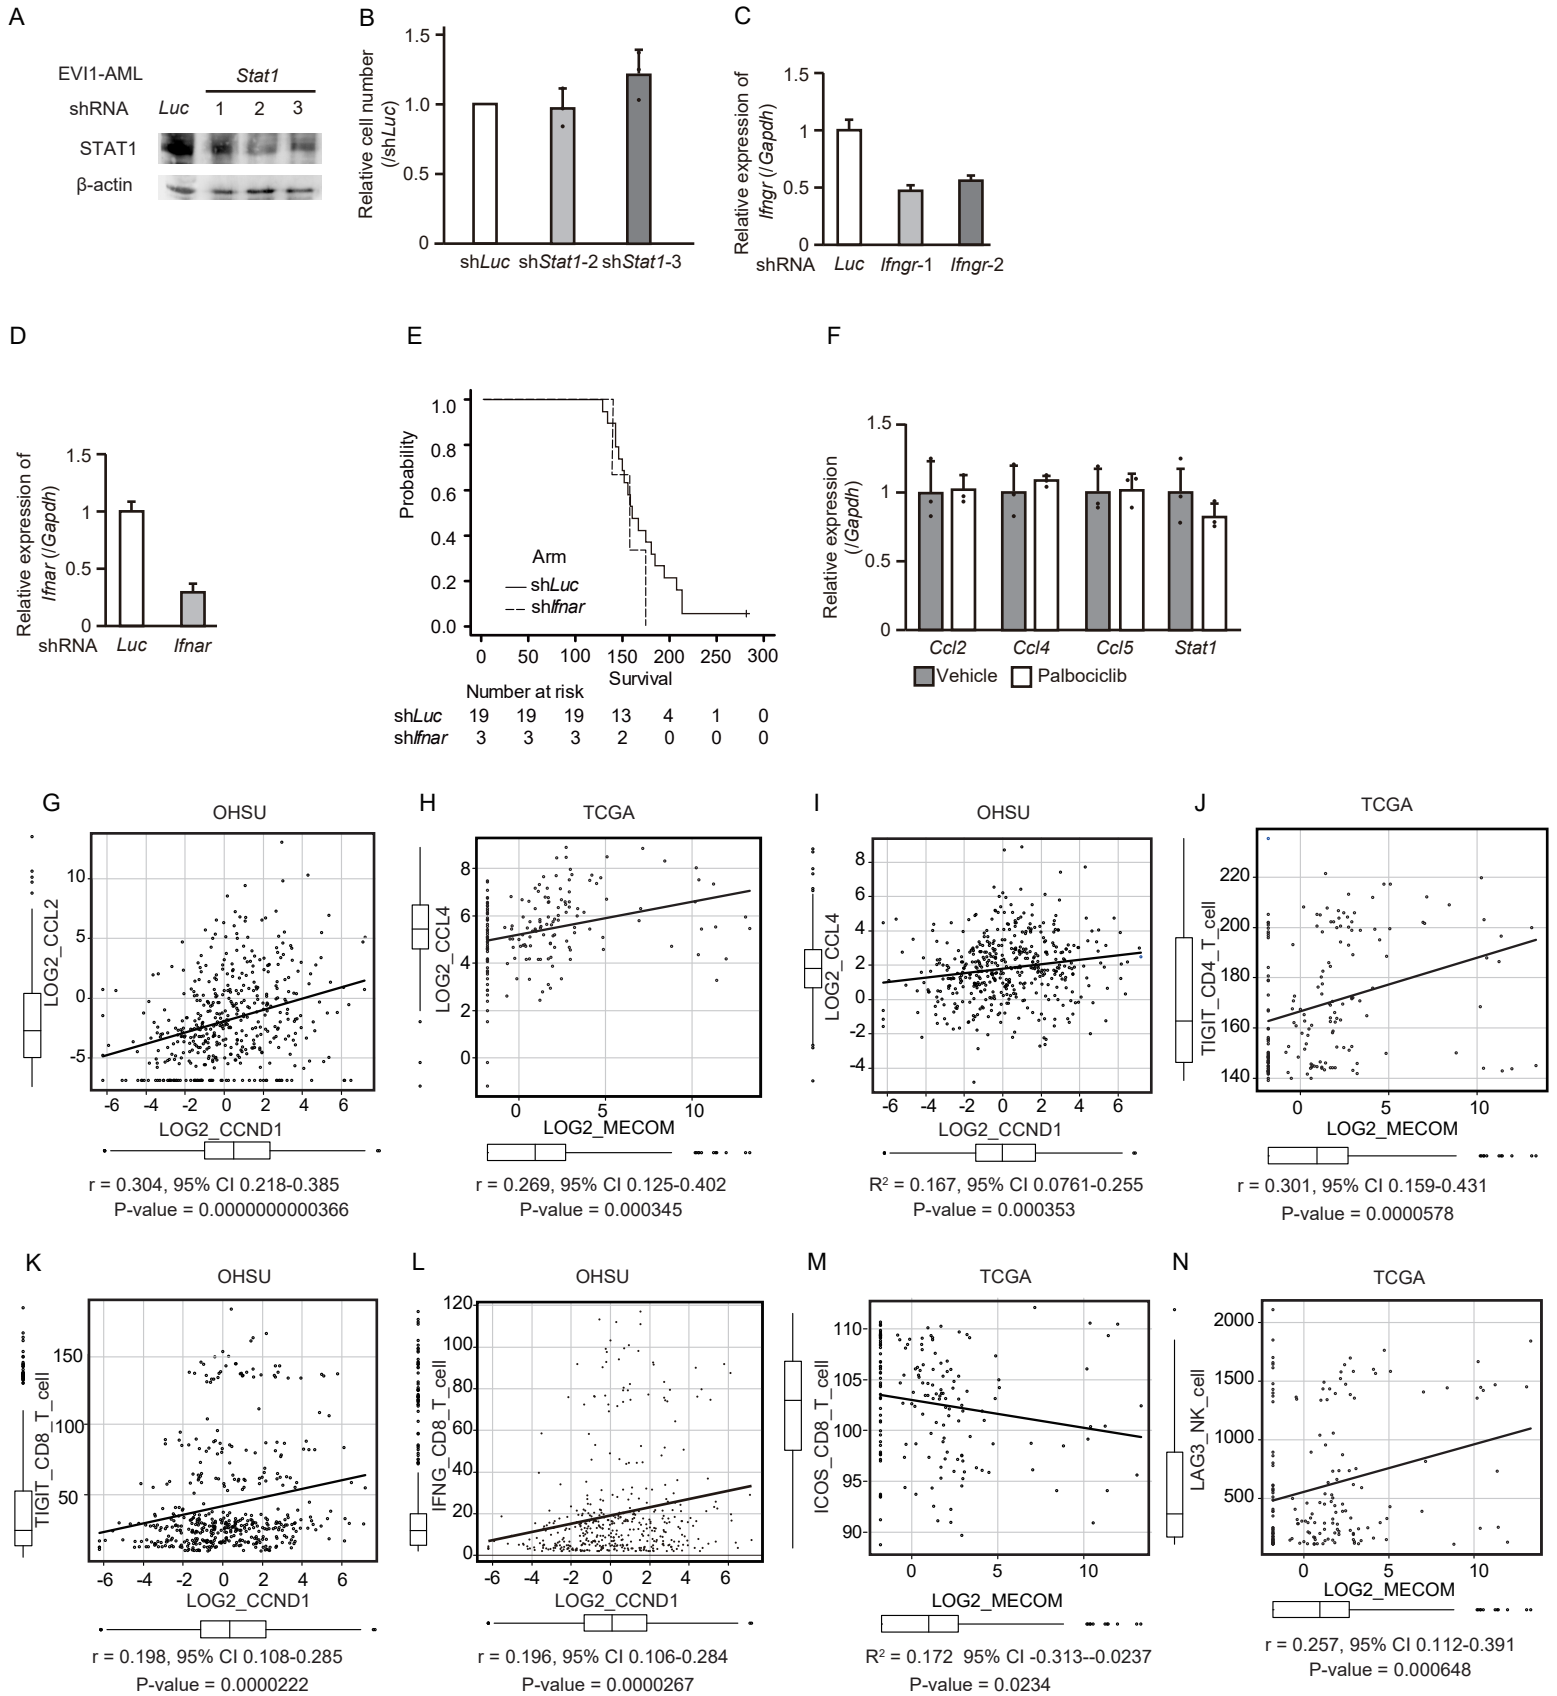

Supplement: BLOODA_ADV-2022-008018-mmc1.pdf [file BLOODA_ADV-2022-008018-mmc1.pdf]
